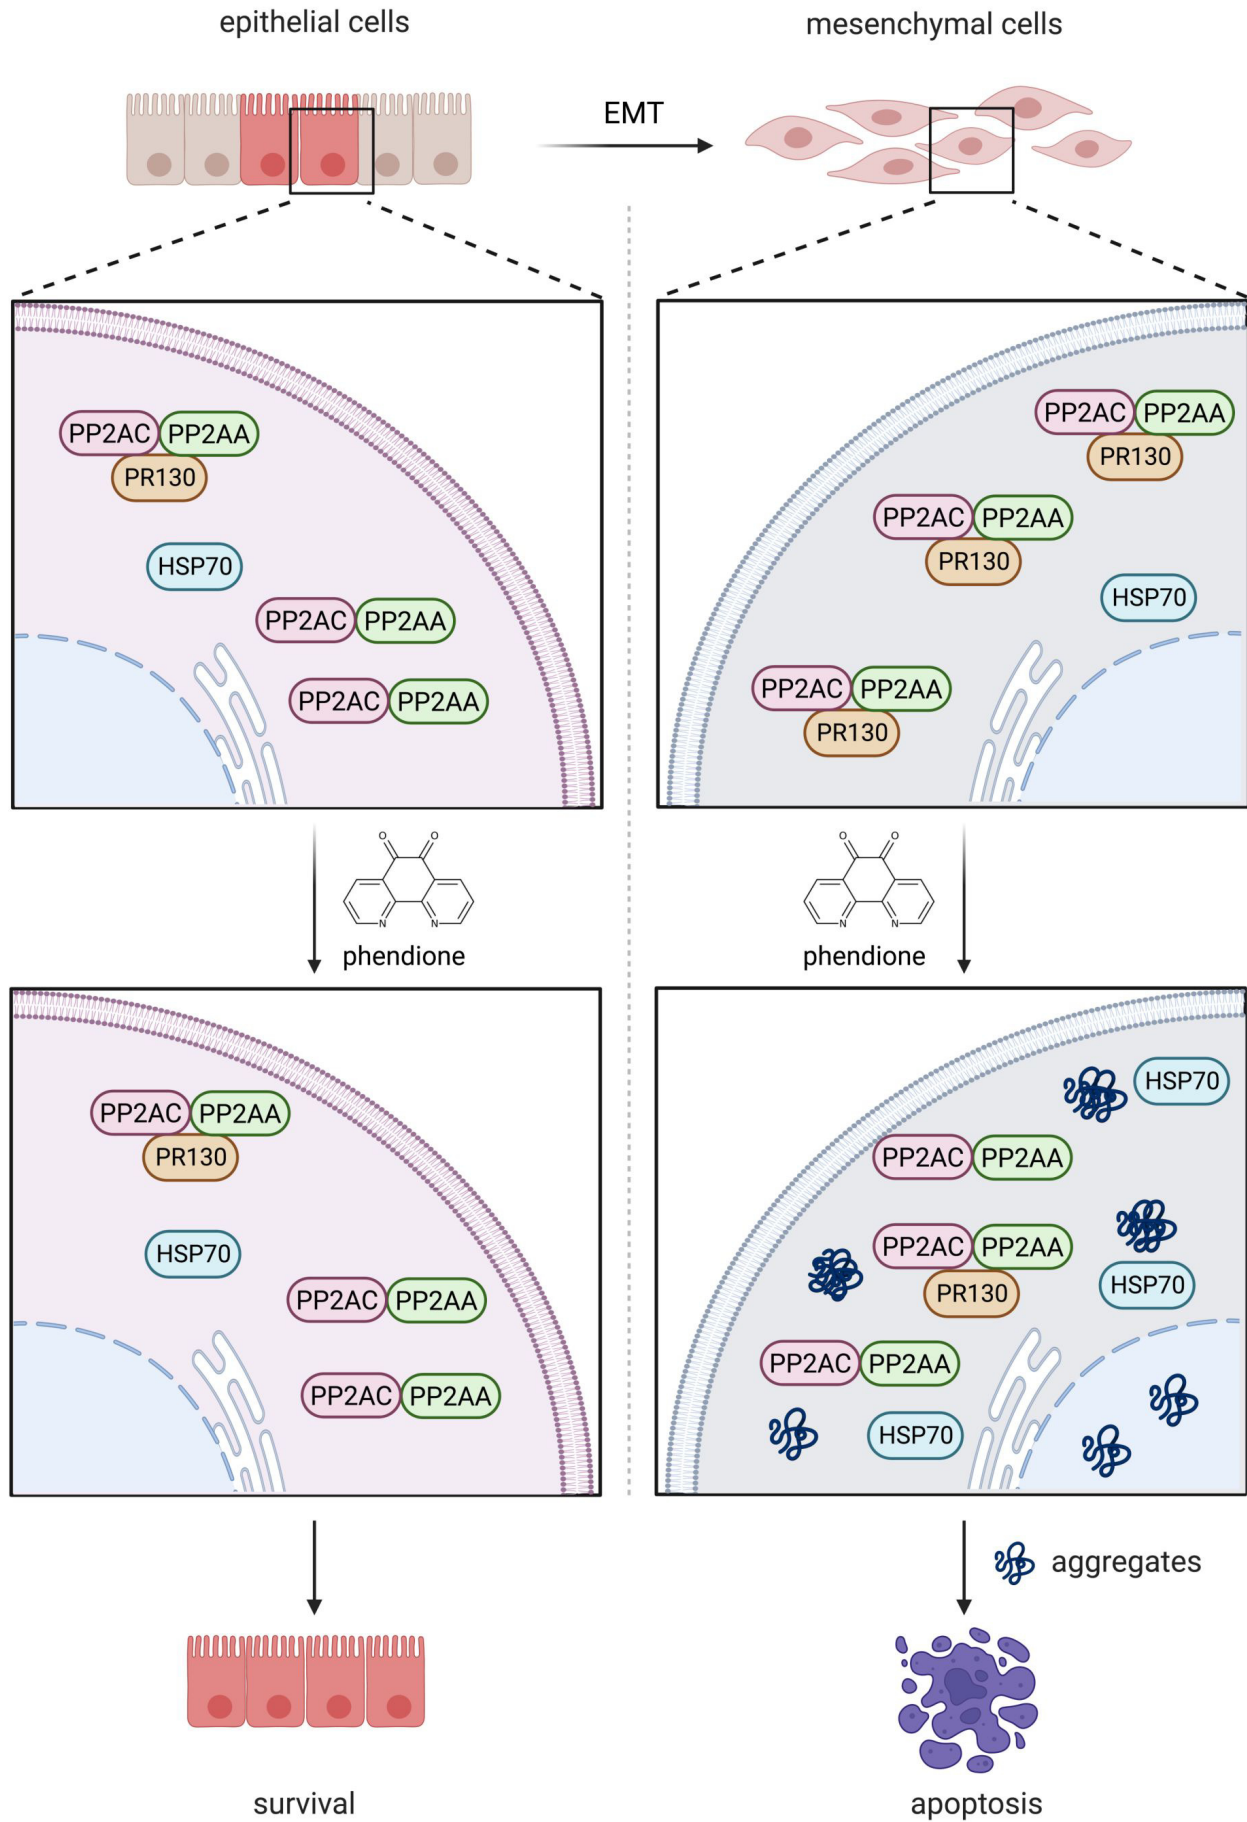

1 **The protein phosphatase-2A subunit PR130 is linked to cytotoxic protein aggregate**  
2 **formation in mesenchymal pancreatic ductal adenocarcinoma cells**

3

4 Alexandra Nguyen<sup>1</sup>, Alessa K. Leydecker<sup>1</sup>, Al-Hassan M. Mustafa<sup>1,2</sup>, Janine Murr<sup>3</sup>,  
5 Falk Butter<sup>4,5</sup>, and Oliver H. Krämer<sup>1,\*</sup>

6

7 <sup>1</sup> Department of Toxicology, University Medical Center, Obere Zahlbacher St. 67, 55131

8 Mainz, Germany; alexandra.nguyen@uni-mainz.de; alessa-leydecker@web.de;

9 alabdeen@uni-mainz.de; okraemer@uni-mainz.de

10 <sup>2</sup> Department of Zoology, Faculty of Science, Aswan University, Aswan, Egypt

11 <sup>3</sup> Medical Clinic and Polyclinic II, Klinikum rechts der Isar, Technical University Munich, 81675

12 München, Germany; janine.murr@tum.de

13 <sup>4</sup> Institute of Molecular Biology (IMB), Ackermannweg 4, 55128 Mainz, Germany; f.butter@imb-  
14 mainz.de

15 <sup>5</sup> Federal Research Institute for Animal Health, Südufer 10, 17493 Greifswald - Insel Riems;

16 Falk.Butter@fli.de

17

18 \* correspondence to: okraemer@uni-mainz.de

19

20 **RUNNING TITLE**

21 Novel and druggable cancer-relevant function of PP2A-PR130

22

23 **HIGHLIGHTS**

- 24 ➤ The PP2A subunit PR130 is a molecular marker of mesenchymal PDAC cells
- 25 ➤ The small molecule PP2A inhibitor phendione selectively kills mesenchymal PDAC
- 26 cells
- 27 ➤ Phendione decreases PR130 through proteasomes and selectively increases the heat
- 28 shock protein 70 kDa in mesenchymal PDAC cells

- 29       ➤ HSP70 promotes cell survival upon inhibition of PP2A
- 30       ➤ PP2A-PR130 regulates the accumulation of cytotoxic protein aggregates in
- 31           mesenchymal PDAC cells

32

### 33 **ABSTRACT**

34 Protein phosphatase-2A (PP2A) is a major source of cellular serine/threonine phosphatase  
35 activity. PP2A B-type subunits regulate the intracellular localization and the catalytic activity of  
36 PP2A-A/PP2A-C complexes towards individual proteins. There is limited knowledge on how  
37 PP2A B-type subunits regulate biologically important functions and if these subunits determine  
38 the growth and drug responsiveness of tumor cells. Pancreatic ductal adenocarcinoma (PDAC)  
39 is a dismal disease with poor prognosis. Mesenchymal PDAC subtypes are more aggressive  
40 and metastasis-prone than epithelial subtypes. We show that mesenchymal PDAC cells  
41 express significantly higher levels of the PP2A B-type subunit PR130 and its mRNA *Ppp2r3a*  
42 than epithelial PDAC cells (n=38). Among 17 PP2A B-type subunits, this differential regulation  
43 is unique for *Ppp2r3a* and PR130. The higher levels of PR130 in mesenchymal PDAC cells  
44 are linked to their vulnerability to the PP2A inhibitor phendione. Phendione induces apoptosis  
45 and an accumulation of cytotoxic protein aggregates in such cells. These processes occur  
46 independently of the major tumor suppressor p53, which is frequently mutated in PDAC cells.  
47 Proteomic analyses reveal that phendione upregulates the chaperone heat shock protein  
48 HSP70 in mesenchymal PDAC cells. Inhibition of HSP70 promotes phendione-induced  
49 apoptosis. We additionally disclose that phendione promotes a proteasomal degradation of  
50 PR130. Genetic elimination of PR130 sensitizes mesenchymal PDAC cells to phendione-  
51 induced apoptosis and protein aggregate formation. These data illustrate pharmacologically  
52 amenable, selective dependencies of mesenchymal PDAC cells on PP2A-PR130 and HSP70.  
53 PP2A inhibition triggers a harmful accumulation of protein aggregates in neurons. This  
54 undesired mechanism might be exploited to kill mesenchymal tumor cells.

55

## 56 INTRODUCTION

57 Annual new cancer cases will increase by 21.4% in Europe in the next decade.<sup>1</sup> Within the  
58 malignant neoplasms, pancreatic ductal adenocarcinoma (PDAC) remains a particularly  
59 dismal disease. The incidence and mortality of PDAC are increasing and the disease is  
60 expected to become the second leading cause of cancer-related deaths, with a current 5-year  
61 survival rate of only 12%.<sup>2,3</sup> In 80-85% of patients with locally advanced or disseminated  
62 disease, the DNA-damaging chemotherapeutics folinic acid, fluorouracil, irinotecan and  
63 oxaliplatin or nab-paclitaxel and gemcitabine are standards of care.<sup>4</sup> Such therapies result in  
64 overall response rates of only 20-30% and is associated with severe adverse events impacting  
65 the quality of life.<sup>4</sup> Thus, novel therapies to treat PDAC are urgently needed.

66 To improve the prognosis of PDAC through concepts of precision oncology, it is necessary to  
67 characterize PDAC cells better, to develop novel mechanism-based therapies, and to define  
68 reliable molecular markers for drug responsiveness. PDAC subtypes with diverse clinical  
69 responses to therapies and a differential impact on the survival of patients were identified.  
70 These are the squamous/basal-like/quasi-mesenchymal, classic/progenitor, immunogenic,  
71 and aberrantly differentiated endocrine exocrine subtypes. The recurrently identified and  
72 validated mesenchymal subtype (squamous/basal-like) ties in with the worst patient prognosis.  
73 This subtype is associated with early cancer cell dissemination and chemoresistance.<sup>5,6</sup>

74 Protein kinases catalyze the transfer of  $\gamma$ -phosphate groups from ATP molecules to serine,  
75 threonine, or tyrosine residues. Kinases are dysregulated in most if not all cancers. This has  
76 spurred the development of numerous kinase inhibitors.<sup>7-9</sup> Depending on the tumor type, these  
77 agents produce therapeutic benefits. Phosphatases remove phosphate groups hydrolytically  
78 from many physiologically important proteins. This makes phosphatases attractive enzymes  
79 for the development of targeted therapies. Their therapeutic potential has yet not been fully  
80 exploited.<sup>10</sup>

81 The protein phosphatase 2A (PP2A) is a major source of cellular serine/threonine phosphatase  
82 activity.<sup>11</sup> Trimeric PP2A complexes contain the scaffolding A subunit (PP2A-A), the  
83 catalytically active C subunit (PP2A-C), and one of at least 17 regulatory B-type subunits. B-

84 type subunits regulate the intracellular localization of PP2A and bind individual proteins to  
85 confer substrate specificity to PP2A. PP2A is well-known to control cell death by apoptosis,  
86 limited cell digestion by autophagy, cell cycle progression, cell proliferation, aging, and  
87 differentiation, as well as DNA repair.<sup>11-13</sup> Far less is known about the biological functions of  
88 individual PP2A B-type subunits.<sup>10,11</sup> This applies to an impact of PP2A on the delicate balance  
89 between protein synthesis and degradation.<sup>14</sup> It is unclear if the accumulation of cytotoxic  
90 protein aggregates upon PP2A inhibition, which is seen in neurological diseases and causes  
91 the formation of proteinaceous aggregates,<sup>15,16</sup> occurs in tumor cells. How this accumulation  
92 of misfolded proteins affects them, if this is therapeutically exploitable, and if certain PP2A B-  
93 type subunits control protein aggregate formation awaits further experimental validation. The  
94 clearance of aggregates involves protein degradation by the ubiquitin-proteasome-system,<sup>15</sup>  
95 autophagy,<sup>16</sup> and the family of heat shock proteins (HSPs) ensuring proper protein  
96 (re)folding.<sup>17-19</sup>

97 The notion that PP2A is frequently inactivated in human cancers and studies in mice suggest  
98 that PP2A is a tumor suppressor.<sup>20</sup> However, PP2A can likewise exert pro-oncogenic functions.  
99 For instance, in a murine chemical carcinogenesis model for hepatocellular carcinoma, an  
100 overexpression of PP2A-C leads to more and larger tumors.<sup>21,22</sup> High expression levels of  
101 certain PP2A subunits are also linked to cell transformation and the aggressiveness of human  
102 tumors. These include the B-type subunits PPP2R2D in gastric cancer and PR130 (encoded  
103 by the gene *PPP2R3A*) in liver cancer.<sup>22-26</sup> A recent work analyzed Cancer-Genome-Atlas  
104 (TCGA) datasets and surgically removed human PDACs for a link between the *PPP2R3A*  
105 mRNA expression and PR130 with patient survival. PR130 was found to be associated with  
106 poor prognosis and with tumor recurrence.<sup>27</sup> The PP2A B-type subunit *PPP2R5A* was also  
107 linked to the metastatic spreading of PDAC cells.<sup>28</sup> Additional work is required to fully  
108 understand how PP2A B-type subunits determine carcinogenesis. For example, it is not clear  
109 if PR130 is linked to certain tumor subtypes.

110 Extending the limited data on the roles of PP2A in PDAC are encouraged by a phase 1 clinical  
111 trial of the PP2A inhibitor LB-100 (NCT01837667). LB-100 produced a promising partial

112 remission in one PDAC patient.<sup>29</sup> Further investigations are obviously needed to evaluate if  
113 PP2A inhibition is a valid treatment option. Moreover, it is necessary to find biochemical  
114 markers of drug effectiveness. This requires increasingly specific PP2A inhibitors and the  
115 identification of cancer cell types that require PP2A for their growth and survival.  
116 Here we demonstrate that mesenchymal PDAC cells express higher levels of PR130 than  
117 epithelial PDAC cells. To investigate the relevance of this finding and the associated molecular  
118 mechanisms, we used the recently identified small molecule PP2A inhibitor 1,10-  
119 phenanthroline-5,6-dione (phendione). We tested phendione because it is more effective and  
120 specific for PP2A than LB100.<sup>30</sup> We identify that an upregulation of the chaperone heat shock  
121 protein 70 kDa (HSP70) is a druggable escape mechanism of mesenchymal PDAC cells upon  
122 inhibition of PP2A. In cells with inhibited PP2A, PR130 regulates apoptosis and the  
123 accumulation of cytotoxic protein aggregates.

124

## 125 **RESULTS**

126 Differential expression of *Ppp2r3a* and PR130 in epithelial and mesenchymal PDAC cells  
127 We previously analyzed the responses of various genetically defined murine PDAC cells to  
128 DNA replication stress inducers and epigenetic drugs.<sup>31</sup> During this study, we perceived that  
129 the protein expression of PR130 varied considerably between different PDAC cell lines. This  
130 notion and the fact that very little is known about an association of distinct PP2A B-type  
131 subunits with certain tumor types and subtypes let us investigate this systematically. We  
132 studied the mRNA expression levels of PP2A B-type subunits in 15 mesenchymal and 23  
133 epithelial cell lines. These cells were recently isolated from genetically defined murine  
134 PDACs.<sup>32</sup> We found that mesenchymal PDAC cells have higher expression levels of the  
135 *Ppp2r3a* mRNA encoding PR130 than epithelial PDAC cells (per nomenclature rules, the  
136 murine mRNA encoding PR130 is noted as *Ppp2r3a* and the human mRNA encoding PR130  
137 is noted as *PPP2R3A*; the encoded murine and human proteins are both termed PR130). This  
138 was specifically seen for *Ppp2r3a* and not for other PP2A B-type subunits and the  
139 catalytic/regulatory PP2A subunits *Ppp2ca* and *Ppp2r1a* (Fig. 1a).

140 The differences in the levels of *Ppp2r3a* in epithelial and mesenchymal PDAC cells were  
141 statistically significant (Fig. 1b). Immunoblot analyses confirmed higher expression levels of  
142 PR130 in mesenchymal PDAC cells compared to epithelial murine PDAC cells (Fig. 1c). These  
143 differences were also statistically significant (Fig. 1d).

144 To test if the increased expression of PR130 in mesenchymal is associated with divergent  
145 protein levels of the structural PP2A-A and the catalytic PP2A-C subunits, we carried out  
146 immunoblots. We found that mesenchymal and epithelial PDAC cells carried similar levels of  
147 these major PP2A subunits. We validated the epithelial subtype by detecting the epithelial cell  
148 identity marker E-cadherin (Fig. 1e).

149 These data illustrate that the levels of *Ppp2r3a* and PR130 are a novel molecular marker to  
150 discriminate mesenchymal and epithelial PDAC cells.

151

152 Pharmacological inhibition of PP2A induces apoptosis in mesenchymal PDAC cells

153 The differential expression of PR130 in epithelial and mesenchymal PDAC cells suggests that  
154 these subtypes divergently control PP2A-dependent phosphorylation events. We  
155 hypothesized that such differences are linked to variable responses of such cells to an  
156 inhibition of PP2A. We tested this with the specific PP2A inhibitor phendione.<sup>30</sup> We treated the  
157 mesenchymal cell lines S411 and 8248 and the epithelial cell lines S821 and 8296 with 0.5  $\mu$ M  
158 to 10  $\mu$ M phendione for 24 h. Microscopical images revealed that  $\geq 3$   $\mu$ M phendione caused  
159 mesenchymal PDAC cells to round up and detach from the surface of the flasks. Phendione  
160 did not alter the morphology of epithelial PDAC cells (Fig. 2a).

161 We speculated that such phendione-induced morphological changes of mesenchymal PDAC  
162 cells were linked to apoptosis (programed cell death). To test this, we stained the cells with the  
163 very sensitive apoptosis marker annexin-V/PI and subjected them to flow cytometry analyses.  
164 Annexin-V stains early and late apoptotic cells and PI additionally accumulates in late apoptotic  
165 and necrotic cells. Congruent with the results depicted in Fig. 2a, we found that phendione  
166 significantly induced apoptosis in mesenchymal PDAC cells (S411 and 8248) (Fig. 2b). After  
167 24 h, 3  $\mu$ M phendione caused apoptosis in 96% of S411 cell cultures and in 37% of 8248 cell

168 cultures. Annexin/PI-positive 8248 cells increased up to 98% after a 48-h treatment with 3  $\mu$ M  
169 phendione (Supplementary Fig. 1a), indicating that both cell lines show similar time-dependent  
170 responses. The  $IC_{50}$  values for phendione-induced apoptosis after 24 h are 3.3  $\mu$ M for S411  
171 and 3.5  $\mu$ M for 8248 cells.

172 Even when they were incubated with 10  $\mu$ M phendione for up to 48 h, the epithelial S821 and  
173 8296 PDAC cell cultures showed no significant signs of apoptosis (Fig. 2c, Supplementary Fig.  
174 1b). We noted analogous effects in mesenchymal 3250 and epithelial 9591 cells after treatment  
175 with phendione for 24-48 h (Supplementary Fig. 1c-f).

176 To investigate time-dependent apoptosis induction by phendione, we treated mesenchymal  
177 and epithelial cell systems with 10  $\mu$ M phendione for 1 h to 24 h. We used the 3-fold  $IC_{50}$  (Fig.  
178 2b) to detect early apoptotic events. Phendione induced apoptosis in mesenchymal S411 cells  
179 significantly after 8 h. The same effect occurred in mesenchymal 8248 cells after only 3 h and  
180 in mesenchymal 3250 cells after 6 h, indicating that these cell lines show similar concentration-  
181 dependent responses to phendione. Under the same conditions, the epithelial cell lines S821  
182 and 8296 did not undergo apoptosis (Fig. 2d-e). In mesenchymal 3250 PDAC cells, phendione  
183 induced apoptosis significantly after 6 h. This effect increased time-dependently  
184 (Supplementary Fig. 1g). In epithelial 9591 cells, phendione produced a small increase in early  
185 and late apoptosis. This effect vanished over time (Supplementary Fig. 1h).

186 Analysis of PR130 levels disclosed that phendione decreased PR130 protein levels in  
187 mesenchymal PDAC cells but not in epithelial PDAC cells (Fig. 2f). The structural PP2A-A and  
188 the catalytical PP2A-C subunits were not affected by phendione in both cell types  
189 (Supplementary Fig. 1i).

190 To control these data, we probed for the anticipated hyperphosphorylation of PP2A target  
191 proteins. We found an increased phosphorylation of the ATM target protein KAP1 after a 3-h  
192 treatment with phendione in both mesenchymal and epithelial PDAC cells. Moreover,  
193 phendione induced an accumulation of the tumor suppressor protein p53, which is stabilized  
194 by its phosphorylation. Phendione likewise induced phosphorylated AKT and phosphorylated  
195 ERK in both cell lines (Fig. 2g). Thus, we can rule out that the lack of cytotoxic effects of



196 phendione on epithelial PDAC cells is due to a lack of uptake or poor biochemical activity of  
197 this drug. We further noted that a 6-h treatment with 3  $\mu\text{M}$  phendione sufficed to reduce PR130  
198 in mesenchymal PDAC cells (Fig. 2g). Together with Fig. 2d and Supplementary Fig. 1g, these  
199 data show that phendione-induced apoptosis correlates with a loss of PR130.

200 A recent study has reported an interplay between PR130 and the tumor suppressor p53 in liver  
201 cancer cells.<sup>26</sup> This may explain why certain PDAC cells are more sensitive to phendione than  
202 others. However, like the phendione-induced accumulation of p53 (Fig. 2g), the levels of p53  
203 and its direct target p21 are not associated with either the phendione-sensitive mesenchymal  
204 or the phendione-resistant epithelial phenotype (Supplementary Fig. 2a). To further test if p53  
205 is required for phendione-induced apoptosis, we treated the p53-negative mesenchymal  
206 murine PDAC cell line W22 with phendione and analyzed apoptosis and proteins of the DNA  
207 damage response. Annexin-V/PI measurements showed that 1-10  $\mu\text{M}$  phendione dose-  
208 dependently caused apoptosis in W22 cells. ATM and the phosphorylation of its direct targets  
209 KAP1 and H2AX were induced, and PR130 was reduced by phendione in such cells. Thus,  
210 phendione can trigger pro-apoptotic effects in p53-negative mesenchymal PDAC cells  
211 (Supplementary Fig. 2b-c).

212 These results demonstrate that phendione induces apoptosis in mesenchymal PDAC cells  
213 p53-independently and that this process is linked to an attenuation of PR130.

214

215 Phendione produces lethal effects in human PDAC cells

216 To investigate the role of PP2A/PR130 in human PDAC cells, we used MIA PaCa-2 cells.  
217 These cells express epithelial and mesenchymal markers and can serve as a p53 mutant  
218 model for the epithelial-mesenchymal transition.<sup>33</sup> We treated MIA PaCA-2 cells with 0.5-10  
219  $\mu\text{M}$  phendione for 24-48 h, stained them with annexin-V/PI, and subjected them to flow  
220 cytometry. This analysis revealed a significant accumulation of cells in early apoptosis. This  
221 process started with 3  $\mu\text{M}$  phendione after 24 h and with 1  $\mu\text{M}$  phendione after 48 h. Upon  
222 treatment with 10  $\mu\text{M}$  phendione for 48 h, 88% of MIA PaCA-2 cells were in early or late  
223 apoptosis. The  $\text{IC}_{50}$  value of phendione in MIA PaCA-2 cells is 3.4  $\mu\text{M}$  (Fig. 3a).

224 To confirm apoptosis induction, we assessed the well-established apoptotic marker cleaved  
225 caspase-3 by immunoblot and we used the anti-apoptotic caspase inhibitor Z-VAD-FMK. After  
226 24 h, 5  $\mu$ M and 10  $\mu$ M phendione evoked the cleavage of caspase-3. Z-VAD-FMK significantly,  
227 though not completely, attenuated the pro-apoptotic effects of phendione in MIA PaCA-2 cells  
228 (Fig. 3b-c).

229 We further verified on-target activities of 1-10  $\mu$ M phendione in MIA PaCa-2 cells as  
230 accumulation of the phosphorylated forms of ATM, KAP1, AKT after 24 h. Moreover, we noted  
231 an induction of full-length and the advent of shorter isoforms of ATM and phosphorylated ATM,  
232 and that phendione attenuated the total levels of AKT and ERK (Fig. 3d).

233 Among murine PDAC cell types, PR130 is associated with the highly aggressive mesenchymal  
234 phenotype (Fig. 1a-d). PR130 was found to be associated with a shorter survival of PDAC  
235 patients.<sup>27</sup> We investigated if phendione decreased PR130 in human PDAC cells like it did in  
236 murine cells (Fig. 2f). Phendione decreased PR130 in MIA PaCa-2 cells dose-dependently  
237 (Fig. 3e). Next, we analyzed by which mechanism PR130 is degraded. We incubated MIA  
238 PaCA-2 cells with the specific proteasomal inhibitor lactacystin or the autophagy inhibitor  
239 chloroquine. Treatment with lactacystin attenuated the phendione-induced reduction of PR130  
240 (Fig. 3f). In contrast, PR130 levels were reduced by phendione irrespective of chloroquine  
241 (Supplementary Fig. 3a).

242 These results illustrate that phendione triggers apoptosis and a proteasomal degradation of  
243 PR130.

244

245 Phendione induces HSP70 and protein aggregates selectively in mesenchymal PDAC cells  
246 To define the molecular mechanisms underlying the differential responses of mesenchymal  
247 and epithelial PDAC cells to phendione, we carried out proteomics. We labeled the  
248 mesenchymal S411 cells and the epithelial 8296 cells with stable amino acid isotopes and  
249 treated them with 2  $\mu$ M phendione for 24 h (such treatment induces 30% apoptosis in S411  
250 cells after 24 h, see below, Fig. 4f). This analysis revealed a uniquely strong induction of the  
251 HSP70 isoform HSP70-1/HSP72 (encoded by the *HSPA1A* gene), and to a lesser extent of its

252 90% homologous isoform HSP70-1L (encoded by the *HSPA1L* gene) in S411 cells upon  
253 treatment with phendione. In 8296 cells, phendione slight induced HSP70-1 and not HSP70-  
254 1L (Fig. 4a). Immunoblots with an antibody that recognizes HSP70, but not the related HSC70,  
255 confirmed these observations in three mesenchymal and three epithelial murine PDAC cell  
256 lines that were treated with 3  $\mu$ M phendione for 24 h. All tested mesenchymal PDAC cells  
257 accumulated HSP70. Epithelial PDAC cells did not accumulate HSP70 upon phendione  
258 treatment (Fig. 4b). We further noted that a 6 h treatment with 3  $\mu$ M phendione sufficed to  
259 induce HSP70 in mesenchymal PDAC cells (Fig. 4c).

260 To test whether phendione induces HSP70 in human cells, we treated MIA PaCA-2 cells with  
261 1-10  $\mu$ M phendione for 24 h. Although to a lesser extent than in murine PDAC cells, MIA PaCa-  
262 2 cells accumulated HSP70 upon phendione treatment (Fig. 4d). When we screened lysates  
263 from phendione-treated MIA PaCA-2 for other HSPs by immunoblot, we noted that phendione  
264 did not modulate HSP105, HSP60, and HSP27 (Fig. 4e). These data suggest a specific control  
265 of HSP70 in both murine and human PDAC cells. This accumulation of HSP70 correlates with  
266 the reduction of PR130 (Figs. 2g, 3e).

267 To analyze the biological role of HSP70, we treated PDAC cells with phendione in combination  
268 with the HSP70 inhibitor JG-98.<sup>34</sup> Flow cytometry assessing apoptosis showed that JG-98  
269 alone did not affect cell viability, excluding off-target toxicity of this agent. The inhibition of both  
270 PP2A and HSP70 synergistically induced apoptosis in S411 and MIA PaCA-2 cell cultures. A  
271 single treatment with 2  $\mu$ M phendione caused 30% apoptosis in S411 cells and this increased  
272 to 81% in the combination treatment. In MIA PaCA-2 cell populations, 22% underwent  
273 apoptosis in the presence of 2  $\mu$ M phendione. This number increased to 49% when 0.5  $\mu$ M  
274 JG-98 was added (Fig. 4f-g). S411 cells are more susceptible than MIA PaCa-2 cells to  
275 phendione $\pm$ JG-98, and this parallels the higher accumulation of HSP70 (Fig. 4b-d). When we  
276 treated epithelial 8296 cells with 2  $\mu$ M phendione and 0.5  $\mu$ M JG-98, we found that this  
277 treatment did not induce apoptosis (Supplementary Fig. 4a). This finding correlates with the  
278 notion that phendione does not induce HSP70 in such cells (Fig. 4b).

279 HSP70 is a molecular chaperone of the protein quality control network (proteostasis). It  
280 attaches to its protein substrates and stabilizes them against denaturation or aggregation until  
281 conditions improve. Moreover, the HSP70-associated system can direct proteins for ubiquitin-  
282 mediated proteasomal degradation and it can resolve cytotoxic protein aggregates that  
283 develop upon compromised protein synthesis and stability.<sup>18,19</sup> To test the formation of such  
284 aggregates, we analyzed vimentin microscopically. Vimentin forms cage-like and spherical  
285 structures around the cell body when aggregates accumulate. Moreover, we analyzed ubiquitin  
286 for its central role in the sorting and labeling of proteins that are to be degraded in the cell.<sup>35,36</sup>  
287 Phendione significantly triggered the formation of ubiquitin foci and vimentin cages in MIA  
288 PaCa-2 cells. These surrounded the cell or appeared as perinuclear structures (Fig. 4h-i). The  
289 staining intensity of vimentin also increased significantly compared to untreated control cells  
290 (Fig. 4j). This was not due to an increased expression of vimentin (Supplementary Fig. 4b).  
291 To quantify the formation of aggregates, we conducted a flow cytometric analysis. We treated  
292 MIA PaCA-2 cells with phendione and measured the accumulation of aggregates. Phendione  
293 caused aggregate formation significantly in such cells (Fig. 4k-l).  
294 These data demonstrate that HSP70 accumulates in phendione-treated PDAC cells. This is  
295 linked to protein aggregate formation.

296

297 Knockdown of PR130 sensitizes PDAC cells to cytotoxic effects of phendione

298 We hypothesized that the higher expression of PR130 and its phendione-induced degradation  
299 in mesenchymal PDAC cells are functionally relevant. To test this, we knocked down PR130  
300 with siRNAs. MIA PaCA-2 cells were transfected with control siRNAs or siRNAs against human  
301 *PPP2R3A* and then treated with phendione. Based on Fig. 3e, we chose 3  $\mu$ M phendione. This  
302 concentration induced a partial but not full decrease of PR130. Cell death measurement  
303 revealed a significantly higher increase in apoptosis in phendione-treated cells lacking PR130  
304 (Fig. 5a). The elimination of PR130 upon siRNA transfection was verified by immunoblot (Fig.  
305 5b). These data suggest an anti-apoptotic role of PR130. Next, we performed siRNA  
306 transfections in murine mesenchymal and epithelial cells. We consistently found that siRNAs

307 against murine PR130 sensitized mesenchymal PDAC cells to pro-apoptotic effects of  
308 phendione (Supplementary Fig. 5a). In epithelial PDAC cells, the knockdown of PR130 did not  
309 sensitize them to phendione (Supplementary Fig. 5b-c).

310 We asked if PR130-depleted mesenchymal PDAC cells mount the HSP70 response upon  
311 phendione treatment. Immunoblots showed that untreated and phendione-treated cells lacking  
312 PR130 had similar HSP70 levels as control cells (Fig. 5b-c). Having excluded that the  
313 elimination of PR130 modulated the accumulation of HSP70, we hypothesized that an  
314 elimination of PR130 augmented the phendione-induced aggregate accumulation. To test this,  
315 we exposed MIA PaCA-2 cells with and without PR130 to phendione for 48 h and quantified  
316 aggregates by flow cytometry. There was a significant difference in the accumulation of  
317 aggregates between phendione-treated cells containing PR130 and cells without PR130 (Fig.  
318 5d-e). As control, we performed the same experiment with murine epithelial PDAC cells. These  
319 did not build up aggregates and did not induce HSP70 in response to phendione  
320 (Supplementary Fig. 5c-d).

321 This dataset demonstrates that PP2A inhibition induces apoptosis which is linked to the  
322 formation of protein aggregates. This process is controlled by PR130.

323

## 324 **DISCUSSION**

325 Reversible phosphorylation is a rapid and straightforward way to modulate biologically relevant  
326 protein functions. PP2A represents ~1% of the cellular protein pool and is a major source of  
327 serine/threonine dephosphorylating activity. Specificity of PP2A is largely controlled by B-type  
328 subunits that direct catalytically active PP2A complexes to their target proteins.<sup>11,12,20</sup> This work  
329 unravels that the mesenchymal PDAC subtype carries high levels of the PP2A B-type subunit  
330 PR130 and has a notable susceptibility to the PP2A inhibitor phendione. Other PP2A B-type  
331 subunits and PP2A C and A subunits are though equally expressed in epithelial and  
332 mesenchymal PDAC cells. Thus, globally altered PP2A mRNA and protein expression levels  
333 in mesenchymal PDAC cells can be ruled out as explanation for the specific vulnerability of  
334 mesenchymal PDAC cells towards phendione. This also applies for the major tumor

335 suppressor p53, which is lost or mutated in 60-70% of human pancreatic cancer and mostly in  
336 later stages of the disease.<sup>37</sup> Phendione triggers apoptosis in p53-negative murine PDAC cells  
337 and in MIA PaCa-2 cells. These express mutant p53 that is unable to bind p53 consensus DNA  
338 sequences. Instead, phendione promotes the accumulation of protein aggregates and  
339 decreases PR130 by a proteasome-dependent mechanism. A further reduction of PR130 by  
340 RNAi augmented apoptosis induction and the accumulation of protein aggregates. This  
341 suggests that PR130-PP2A complexes antagonize cytotoxic protein misfolding and  
342 aggregation. Although epithelial PDAC cells respond to phendione biochemically, they are not  
343 killed by this agent. They likewise do not accumulate protein aggregates when PP2A is  
344 pharmacologically blocked and when PR130 is decreased genetically. We assume that PR130  
345 directs PP2A complexes to proteins that are prone to aggregation in mesenchymal PDAC cells.  
346 Such proteins may be linked to migratory phenotypes and metastatic processes.

347 In neuronal cells, inhibitors of PP2A cause an accumulation of cytotoxic protein aggregates.  
348 This can lead to cell death and neuronal disorders, such as in Alzheimer models.<sup>38</sup> The work  
349 presented here reveals that mesenchymal tumor cells accumulate aggregated proteinaceous  
350 structures, like neuronal cells do when PP2A functions are impaired. Unlike in neurons,  
351 aggregate formation appears to be beneficial in this setting as it can eliminate highly  
352 aggressive PDAC cells. In prospective clinical settings with PP2A inhibitors, careful monitoring  
353 of neuronal functions might be required.

354 We conclude that phendione induces the hyperphosphorylation and consequently the  
355 misfolding of proteins that are prone for aggregation. The heat shock response is a  
356 cytoprotective mechanism against a variety of stressors such as heat shock, oxidative stress,  
357 protein misfolding, and heavy metal ions.<sup>17-19</sup> As a key component of the molecular chaperone  
358 system, HSP70 has house-keeping functions. These functions include the folding and  
359 assembly of de novo synthesized proteins, protein degradation, refolding of misfolded proteins,  
360 and the prevention and removal of protein aggregates. An upregulation of the protein  
361 homeostasis regulator HSP70 indicates disturbed proteostasis. Cells can cope with the  
362 consequent accumulation of misfolded proteins through their proteasomal degradation.<sup>18,19</sup>

363 Alterations in vimentin are markers of misfolded proteins and increased proteasome  
364 activity.<sup>35,36</sup> We noted a phendione-induced clustering of vimentin and its increased  
365 detectability, which is likely a consequence of such clustering. The occurrence of shorter  
366 isoforms of vimentin can be explained by it being a target of caspases-3, -6, and -7 during  
367 apoptosis.<sup>39</sup>

368 The accumulation of protein aggregates indicates that proteasomal degradation is  
369 overwhelmed when PP2A is blocked in mesenchymal PDAC cells. This can also be assumed  
370 for autophagy, which can eliminate protein aggregates.<sup>16</sup> The ineffectiveness of this program  
371 may likewise be caused by the unexpected lack of co-induction of other HSPs, except for a  
372 low increase in DNAJB1/HSP40 that we detected by proteomics. This notion demonstrates  
373 that the accumulation of HSP70 upon PP2A inhibition is mechanistically distinct from the well-  
374 known selective translation of multiple HSPs when proteotoxic stress is caused by proteasome  
375 inhibitors, HSP90 inhibitors, misfolded protein expression, and other proteotoxic stimuli.<sup>17,19</sup>

376 Why are specifically HSP70-1 and HSP70-1L induced by phendione? Coherent with our data,  
377 mesenchymal PDAC sub-populations are very sensitive to inhibitors of protein folding and  
378 turnover, including drugs against HSP90.<sup>40</sup> The serine/threonine phosphatase inhibitor okadaic  
379 acid induced the hyperphosphorylation and consequent inactivation of HSP90.<sup>41</sup> This  
380 mechanism might have caused protein aggregate formation in phendione-treated PDAC cells,  
381 together with an activation of heat shock factor-1.<sup>42</sup> This transcription factor selectively  
382 activates genes encoding HSPs. Although it is tempting to speculate that such an inhibition of  
383 HSP90 induced the accumulation of protein aggregates, our proteome analyses do not show  
384 a general decrease of HSP90 target proteins in mesenchymal cells. Moreover, inhibition of  
385 HSP90 cannot explain the selective accumulation of HSP70. A recent study shows that LB-  
386 100 modulates the RNA splicing machinery.<sup>43</sup> This may prevent the accumulation of HSPs,  
387 except for HSP70 which lacks introns and is not subject to heat shock-repressed translation  
388 inhibition.<sup>44</sup> Our notion that ATM appears in various isoforms in phendione-treated cells may  
389 likewise be a result of altered *ATM* RNA splicing that was observed in LB-100 treated colon

390 cancer cells.<sup>43</sup> Since the levels of total ATM were not altered, caspase-mediated cleavage of  
391 ATM,<sup>43</sup> unlikely explains the occurrence of smaller ATM isoforms.

392 Beyond its protective role in protein homeostasis, HSP70 provides selective advantages to  
393 cancer cells by suppressing multiple cell death pathways, including extrinsic and intrinsic  
394 apoptosis and necrosis.<sup>18,19</sup> We show that a pharmacological inhibition of HSP70 with JG-98  
395 can boost anti-tumor effects of phendione. The mechanism of JG-98 is to block a key allosteric  
396 transition of HSP70 that promotes the degradation of some HSP70 target proteins. JG-98 and  
397 its analogs are largely selective toward HSP70 family members, demonstrated by pulldowns,  
398 overexpression, and point mutation results.<sup>34,45,46</sup> As a pharmacological inhibition of HSP70  
399 was recently found to block the growth of medulloblastoma cells,<sup>47</sup> it will be interesting to see  
400 how many tumor types are susceptible to a combined inhibition of PP2A plus HSP70.

401 Especially in such a treatment setting, neuronal functions should be monitored carefully.

402 Phendione-treated PDAC cells with a genetic depletion of PR130 accumulate more protein  
403 aggregates than corresponding cells with PR130. In PR130-depleted cells, the induction of  
404 HSP70 surprisingly does not increase significantly when PP2A is blocked. Thus, variable  
405 accumulation of HSP70 in cells with and without PR130 cannot explain why decreasing PR130  
406 augments apoptosis induction by phendione. We rather interpret this finding as failure of the  
407 PR130 knock-down cells to increase HSP70 levels further. It appears that the induction of  
408 HSP70 has reached a limit that cannot be increased. Additionally, or alternatively, the loss of  
409 PR130 did not allow a further increase in HSP70 despite the occurrence of more aggregates.

410 Obviously, the accumulation of HSP70 cannot prevent aggregates building up and the  
411 induction of apoptosis by phendione. Since HSP70 can also promote the poly-ubiquitination  
412 and proteasomal degradation of proteins in a complex with the E3 ubiquitin ligase CHIP,<sup>19</sup> it is  
413 possible that this mechanism reduced PR130. Thus, HSP70 may promote protein aggregate  
414 removal as well as the loss of PR130 promoting the buildup of such structures. Although these  
415 data suggest insufficient molecular mechanisms for aggregates detoxification, the pro-  
416 apoptotic effects of the pharmacological inhibition of HSP70 upon PP2A inhibition verify that  
417 HSP70 is part of a cellular rescue program.



418 Previously published data,<sup>27</sup> and our finding that mesenchymal PDAC cells express more  
419 PR130 than epithelial cells suggest that PR130 is a biomarker for reduced overall patient  
420 survival. It is currently unclear why mesenchymal murine cells and aggressive human PDACs  
421 have higher *Ppp2r3a/PPP2R3A* mRNA and PR130 protein levels. Recent data have  
422 demonstrated that cytokines induce the mRNA and protein expression of *PPP2R3A* and  
423 PR130 in murine and human cells. These include EGFR signaling in cardiac cells,<sup>48</sup> and TGF-  
424  $\beta$ 1 in pulmonary fibroblast cells.<sup>49</sup> Such stimuli are associated with tumorigenesis and  
425 metastatic tumor cell traits. Thus, they may promote the expression of PR130.  
426 In sum, our findings demonstrate that inhibitors of PP2A and HSP70 kill mesenchymal PDAC  
427 cells and that PR130 controls cytotoxic protein aggregate formation. These insights may  
428 prospectively offer new approaches and strategies for biomarker identification and a subtype  
429 specific, personalized treatment option for PDAC patients.

430

## 431 **MATERIAL AND METHODS**

### 432 Drugs and chemicals

433 1,10-Phenanthroline-5,6-dione, lactacystin, triton X-100, and propidium iodide (PI) were from  
434 Sigma-Aldrich Chemie GmbH, Munich, Germany; annexin V-FITC was from Miltenyi Biotec,  
435 Bergisch Gladbach, Germany; chloroquine was from Enzo Life Sciences GmbH, Lörrach,  
436 Germany; Z-VAD-FMK and the HSP70 inhibitor JG-98 were from Selleck Chemicals, Munich,  
437 Germany; dithiothreitol was from PanReac AppliChem, Darmstadt, Germany, formaline (37%)  
438 and bovine milk powder were purchased from Carl Roth, Karlsruhe, Germany.

439

### 440 Cell culture

441 The isolation and characterization of PDAC cells and details on MIA PaCa-2 cells have been  
442 described.<sup>31,32,50</sup> PDAC cell lines were cultured in high glucose Dulbecco's Modified Eagle's  
443 medium (D0819, Sigma-Aldrich, Chemie GmbH, Munich, Germany), containing 5-10% fetal  
444 calf serum (S0615, Sigma-Aldrich, Chemie GmbH, Munich, Germany) and 1%  
445 penicillin/streptomycin (P4333, Thermo Fisher, Frankfurt/Main, Germany). Mesenchymal

446 (S411, 8513, 8248, 3250) and epithelial (8296, S821, 9591) PDAC cells were detached from  
447 flasks with 0.5% trypsin-EDTA (15400054, Gibco, Paisley, UK) and re-seeded 1:10 twice per  
448 week. The cells were used until passage 12, tested negative for mycoplasma, and MIA PaCa-  
449 2 cells were authenticated by DNA fingerprinting (DSMZ, Braunschweig, Germany).

450

451 Protein detection

452 Immunoblot analyses were carried out as described by us.<sup>31</sup> Membranes were blocked in 5%  
453 milk diluted in TBS-tween-20. Antibodies were diluted in 2% milk/TBS-tween-20. Antibodies  
454 were from Cell Signaling, Frankfurt/Main, Germany: PP2A-A (cs-2039), 1:1.000; PP2A-C (cs-  
455 2259), 1:1.000; E-cadherin (cs-3795), 1:500; p-AKT (Ser473) (cs-9271S), 1:1.000; p-ERK1/p-  
456 ERK2 (Tyr202/Tyr204) (cs-9101), 1:1.000; cleaved caspase-3 (cs-9661), 1:500; ATM (cs-  
457 2873), 1:500; ERK1/ERK2 (p44/42) (cs-9102), 1:500;  $\gamma$ H2AX (Ser139) (cs-9718), 1:1.000;  
458 Santa Cruz, Heidelberg, Germany: HSP90 (sc-13119), 1:5.000; p53-DO1 (sc-126), 1:5.000;  
459 vinculin (7F9) (sc-73614), 1:5.000; HSP70 (sc-66048), 1:1.000; vimentin (sc-6260), 1:1.000;  
460 Novus Biologicals, Wiesbaden, Germany: PR130 (NBP1-87233), 1:500;  $\beta$ -actin (sc-47778),  
461 1:5.000; p-KAP1 (Ser824) (NB100-2350), 1:5.000; Merck, Darmstadt, Germany: ubiquitin  
462 (Lys48) (05-1307), 1:500; Abcam, Cambridge, UK: AKT (abcam-32505), 1:1.000; p21 (ab-  
463 109199), 1:500 and p-ATM (Ser1981) (ab81292), 1:500; Novocastra Leica Biosystems,  
464 Wetzlar, Germany: p53 (NCL-p53-CM5p), 1:500. Secondary antibodies coupled to AlexaFluor-  
465 488 (red) for immunofluorescence were from Thermo Fisher (Frankfurt/Main, Germany) and  
466 fluorescent secondary antibodies coupled to Cy3 (green) were from Jackson Immuno  
467 Research (Cambridgeshire, UK).

468

469 Measurement of cell viability by flow cytometry

470 Floating and detached cells were collected in FACS tubes and centrifuged at 1.300 rpm for 5  
471 min. The supernatants were discarded, pellets were resuspended in PBS, and centrifuged at  
472 1.300 rpm for 5 min. Afterwards, cells were stained with annexin/V for 20 min at room  
473 temperature. Upon adding PI, the samples were measured with a FACS Canto flow cytometer

474 and analyzed with the BD FACSDiva™ Software (BD Biosciences, Heidelberg, Germany).  
475 During apoptosis, the plasma membrane undergoes structural changes. This leads to a  
476 translocation of phosphatidyl-serine to the extracellular side of the plasma membrane.  
477 Annexin-V binds to phosphatidyl-serine and generates a positive detection signal in flow  
478 cytometry. Addition of PI allows detection of late apoptotic or necrotic cells, due to the  
479 breakdown of the cellular membrane potential and the consequent inability to export PI.

480

481 Genetic knockdown using siRNA

482 Knockdown of PR130 in murine and human PDAC cells was performed by transfecting  
483 30 pmol of validated siRNA molecules targeting the *PPP2R3A/Ppp2r3a* mRNAs (murine:  
484 Santa Cruz, sc-108917, 10 µM stock solution; human: Thermo Fisher Scientific, 4392420, 10  
485 µM stock solution) with Lipofectamin® RNAiMAX Reagent (Thermo Fisher Scientific, 13778-  
486 075). For control cells corresponding amounts of non-targeting control siRNA-B (Santa Cruz,  
487 sc-44230, 10 µM) were used. For each well, 20 µL Lipofectamin® RNAiMAX Reagent, 400 µL  
488 Opti-MEM® (Gibco, 31985-070) and siRNA against *PPP2R3A/Ppp2r3a* or control siRNA-B  
489 were incubated for 10 min at RT. The mixture was added drop by drop to the cells and  
490 incubated for 24 h. After 24 h, cells were treated with phendione. Knockdown was verified by  
491 immunoblotting.

492

493 Stable isotope labeling with amino acids in cell culture (SILAC) and proteome analyses

494 PDAC cells were labeled with stable amino acid isotopes in cell culture for 2 weeks. We  
495 cultured them in light medium (L-arginine-0 and L-lysine-0) or heavy medium (L-arginine-10  
496 and L-lysine-8). The resulting mass differences could be detected by mass spectrometry. After  
497 the period of growing, cells were seeded, and treated with phendione. Floating and detached  
498 cells were collected in reaction tubes and centrifuged at 1.300 rpm for 5 min. After washing the  
499 pellets with PBS and centrifugation, NuPAGE® LDS Sample Buffer (1x) (Thermo Fisher  
500 Scientific, NP0007) with 10% 1 M dithiothreitol was added to the pellets. The samples were  
501 incubated for 30 min on ice. Lysates were sonified (10 s), heated (70° C, 10 min), and

502 centrifuged (25 min, 13.000 rpm). Supernatants were transferred to new reaction tubes.

503 Samples were measured by mass spectrometry as described.<sup>51,52</sup> All proteomics data are

504 deposited to the ProteomeXchange Consortium via the PRIDE partner repository, dataset

505 identifier PXD044854.<sup>53</sup>

506

507 Protein aggregate detection

508 The aggresome detection kit (ab139486) was from Abcam, Cambridge, UK. Cells were

509 detached by trypsin/EDTA and centrifuged at 1.300 rpm for 5 min. Pellets were washed in 2

510 mL PBS, centrifuged (5 min, 1.300 rpm), and supernatants were discarded. Pellets were

511 resuspended in 200  $\mu$ L PBS and added dropwise to 2 mL of a 4% formaldehyde solution (37%

512 formalin in 1x assay buffer). The tubes were mixed carefully to complete the fixation step. After

513 the cell suspensions were incubated for 30 min at RT, a centrifugation step at 800 x g for 15

514 min was done. The supernatants were removed, pellets resuspended in 2 mL PBS, and

515 centrifuged at 800 x g for 15 min. To permeabilize the cells, 0.5% triton X-100 and 3 mM EDTA

516 (pH = 8) in 1x assay buffer was added by gentle mixing and incubation for 30 min on ice.

517 Afterwards, cells were centrifugated at 800 x g for 15 min and washed with PBS. The cell

518 suspensions were placed in a cell strainer and centrifuged to remove cellular debris. To detect

519 aggregates, 500  $\mu$ L of freshly prepared aggresome red detection reagent (1:5.000 in 1x assay

520 buffer) was added to the pellets and incubated for 30 min in the dark. Samples were measured

521 with FACS Canto flow cytometer and analyzed with the BD FACSDiva™ Software.

522

523 Immunofluorescence analyses

524 Cells were seeded and treated on coverslips. After 24 h, the coverslips were washed with PBS

525 once and fixed in an acetone-methanol-solution (3:7) at -20 °C for 8 min. Blocking solution

526 (10% BSA, 0.25% triton X-100 in PBS) was added and incubated for 1 h at RT. Incubation with

527 the primary antibodies was carried out overnight in a wet chamber at 4 °C. Antibodies against

528 ubiquitin (1:100) and vimentin (1:200) were diluted in blocking solution. The next day, the

529 coverslips were washed with PBS (thrice for 5 min) and incubated for 1 h at room temperature

530 with secondary antibodies (1:400, diluted in blocking solution). Cells were washed twice with  
531 PBS, once with high salt PBS (0.4 M NaCl in PBS) for 2 min, and once more with PBS. Using  
532 a scalpel and tweezers, we carefully placed the coverslips on a slide and added 10  $\mu$ L  
533 Vectashield® (Biozol, Vec-H-1.000) containing TO-PRO™-3 (Thermo Fischer, T3605) in a  
534 dilution of 1:100 to stain the nuclei. Images were captured with the confocal microscopy Zeiss  
535 Axio Observer.Z1 microscope equipped with a LSM710 laser-scanning unit (Carl Zeiss, Jena,  
536 Germany). Analysis was performed with the software ImageJ.

537

538 Statistics

539 Statistical analyses were carried out using one-way or two-way ANOVA and unpaired t-test  
540 from GraphPad Prism Vers.8.3.0 software. Correction of statistical analyses was achieved with  
541 Bonferroni multiple comparison; *p* values indicate statistical significance.

542

543 **LEGENDS**

544

545 **Fig. 1** PR130 and *Ppp2r3a* are highly expressed in the mesenchymal PDAC subtype. **a**  
546 Heatmap of color-coded mRNA expression data for the depicted PP2A subunits in murine  
547 mesenchymal (red,  $n = 15$ ) and epithelial (blue,  $n = 23$ ) cell lines by RNA-sequencing.  
548 Clustering of rows are based on average distance by pearson correlation (cutree = 6).  
549 **b** RNA sequence analyses were done to detect the mRNA expression levels of *Ppp2r3a* in  
550 mouse PDAC cell lines;  $n = 15$  (mesenchymal) and  $n = 18$  (epithelial). Data were statistically  
551 analyzed using unpaired t-test, \*\*\*\*  $p < 0.0001$ ). The y-axis is shown as log2-transformed  
552 values, normalized to total mRNA contents. **c** Immunoblots show PR130 levels in untreated  
553 murine mesenchymal and epithelial PDAC cells. Detection of HSP90 verifies equal sample  
554 loading;  $n = 3$ . **d** Quantification of PR130 detection by immunoblots in mesenchymal and  
555 epithelial PDAC cells; unpaired t-test, \*\*  $p < 0.01$ ). **e** Immunoblot analysis shows the PP2A-A  
556 and PP2A-C protein. The detectability of E-cadherin verifies the epithelial origin of the  
557 mentioned PDAC cells. 8248 and 8296 cells were blotted twice to also test different passages.  
558 HSP90 served as loading control;  $n = 2$ .

559

560 **Fig. 2** The mesenchymal subtype of PDAC is highly susceptible to the PP2A inhibitor  
561 phendione. **a** Morphology of PDAC cells after treatment with 3  $\mu$ M phendione for 24 h;  
562  $n = 3$ . **b** Mesenchymal PDAC cells were incubated with concentrations of phendione up to 10  
563  $\mu$ M for 24 h. Flow cytometry using annexin-V/PI staining was carried out to detect cell vitality  
564 and apoptosis; data are shown as mean values  $\pm$  SD;  $n = 3$ . **c** Epithelial PDAC cells were  
565 treated with 0.5-10  $\mu$ M phendione for 24 h and apoptosis was determined by flow cytometry  
566 for annexin-V/PI;  $n = 3$ . Data were statistically analyzed using two-way ANOVA (\*  $p < 0.05$ , \*\*  
567  $p < 0.01$ , \*\*\*  $p < 0.001$ , \*\*\*\*  $p < 0.0001$ ). **d** Mesenchymal and **e** Epithelial PDAC cells were  
568 incubated with 10  $\mu$ M phendione for up to 24 h. Annexin-positive cells were detected by flow  
569 cytometry;  $n = 2$ . Data were statistically analyzed using unpaired t-test (\*  $p < 0.05$ , \*\*  $p < 0.01$ ,  
570 \*\*\*  $p < 0.001$ , \*\*\*\*  $p < 0.0001$ ). **f** Mesenchymal and epithelial murine PDAC cell lines were

571 treated with 3  $\mu$ M phendione for 24 h. PR130 was measured by immunoblot. HSP90 served  
572 as loading control;  $n = 2$ . **g** PDAC cells were cultured with 3  $\mu$ M phendione for 1 h, 3 h, and 6  
573 h. Phosphorylated forms of KAP1, AKT and ERK, as well as total PR130 and p53 were  
574 detected by immunoblot. HSP90 and  $\beta$ -actin served as independent loading controls;  $n = 3$ .

575

576 **Fig. 3** Phendione induces apoptosis in human PDAC cells. **a** The human PDAC cell line MIA  
577 PaCA-2 was incubated with up to 10  $\mu$ M phendione for 24 h and 48 h. Apoptosis was  
578 determined by flow cytometry for annexin-V/PI ( $n = 3$ ). Data were statistically analyzed using  
579 two-way ANOVA (\*  $p < 0.05$ , \*\*  $p < 0.01$ , \*\*\*  $p < 0.001$ , \*\*\*\*  $p < 0.0001$ ). **b** MIA PaCA-2 were  
580 treated with increasing doses of phendione up to 10  $\mu$ M and collected after 24 h. The total and  
581 cleaved forms of the apoptosis marker caspase-3 were detected by immunoblot. HSP90 is the  
582 loading control;  $n = 2$ . **c** Apoptosis was measured by flow cytometry of MIA PaCa-2 cells that  
583 were exposed for 24 h to 3  $\mu$ M phendione and 50  $\mu$ M of the caspase inhibitor Z-VAD-FMK ( $n$   
584 = 3). Data were statistically analyzed using two-way ANOVA (\*  $p < 0.05$ , \*\*  $p < 0.01$ , \*\*\*  $p <$   
585 0.001, \*\*\*\*  $p < 0.0001$ ). **d** MIA PaCA-2 cells were cultured with 1  $\mu$ M, 3  $\mu$ M, 5  $\mu$ M, and 10  $\mu$ M  
586 phendione for 24 h. Immunoblot was performed for ATM, p-ATM, p-KAP1, AKT, p-AKT, ERK  
587 and p-ERK. Vinculin is used as a loading control;  $n = 3$ . **e** MIA PaCA-2 cells were stimulated  
588 with increasing concentrations of phendione (1-10  $\mu$ M). Immunoblot analyses of whole cell  
589 lysates were performed to detect PR130. HSP90 served as loading control;  $n = 3$ .  
590 Quantification was done by normalizing the PR130 signals to those of vinculin. **f** Immunoblot  
591 of MIA PaCA-2 cells, which were stimulated with phendione and the proteasomal inhibitor  
592 lactacystin was performed to detect PR130. Quantification was done by normalizing the PR130  
593 signals to those of vinculin which was used as loading control;  $n = 3$ .

594

595 **Fig. 4** Phendione treatment of PDAC cells leads to an induction of the heat shock protein  
596 HSP70. **a** The phendione-sensitive cell line S411 and the phendione-resistant cell line 8296  
597 were labeled with stable amino acid isotopes in cell culture media. The global protein  
598 expression profiles of the PDAC cell lines that were incubated with 2  $\mu$ M phendione for

599 24 h were evaluated by proteomics (L = light medium; H = heavy medium; PD = phendione).  
600 **b** Murine PDAC cell lines were treated with 3  $\mu$ M phendione for 24 h. Whole cell extracts were  
601 blotted for HSP70. HSP90 served as loading control;  $n = 3$ . **c** Murine mesenchymal S411 cells  
602 and epithelial 8296 PDAC cells were cultured with 3  $\mu$ M phendione for 1 h, 3 h, and 6 h.  
603 Immunoblot was done to detect HSP70. HSP90 served as loading control;  $n = 3$ . **d** Human  
604 MIA PaCA-2 PDAC cells were cultured with 1  $\mu$ M, 5  $\mu$ M, and 10  $\mu$ M phendione for 24 h.  
605 Immunoblot detected HSP70 and vinculin as loading control;  $n = 3$ . **e** Immunoblot was done to  
606 detect HSP27, HSP60 and HSP105 in MIA PaCA-2 PDAC cells that were treated with 1  $\mu$ M,  
607 3  $\mu$ M, 5  $\mu$ M, and 10  $\mu$ M phendione for 24 h. HSP90 and  $\beta$ -actin are used as independent  
608 loading controls;  $n = 3$ . **f** Mesenchymal murine PDAC cells (S411) and **g** human PDAC cells  
609 (MIA PaCA-2) were incubated with 2  $\mu$ M phendione and 0.5  $\mu$ M of the HSP70 inhibitor JG-98  
610 for 24 h. Apoptosis was measured by flow cytometry using annexin-V/PI staining;  $n = 3$ . Data  
611 were statistically analyzed using two-way ANOVA (\*  $p < 0.05$ , \*\*  $p < 0.01$ , \*\*\*  $p < 0.001$ , \*\*\*\*  $p$   
612  $< 0.0001$ ). **h** MIA PaCA-2 cells were left untreated (con) or were treated with 3  $\mu$ M phendione  
613 for 24 h (PD), fixed, and incubated with anti-vimentin or anti-ubiquitin antibodies. Alexa Fluor-  
614 488 (green, vimentin) and Cy3 (red, ubiquitin) coupled antibodies were used for detection and  
615 TO-PRO3 was used to visualize the nuclei. Representative images are shown;  $n = 2$ . Analysis  
616 of vimentin/ubiquitin foci per cell was done using ImageJ software. Data are shown as mean  $\pm$   
617 SD (one-way ANOVA \*  $p < 0.05$ , \*\*  $p < 0.01$ , \*\*\*  $p < 0.001$ , \*\*\*\*  $p < 0.0001$ ; scale bar, 10  $\mu$ m).  
618 **i** Quantification of ubiquitin foci in phendione treated MIA PaCA-2 cells. Data were collected  
619 by counting 100 cells in each of 2 independent runs. **j** Quantification of vimentin intensity in  
620 phendione-treated MIA PaCA-2 cells. Data were collected by measuring 100 cells in each of 2  
621 independent runs. **k** MIA PaCA-2 cells were seeded and treated with phendione for 48 h; con,  
622 untreated. The cells were collected and analyzed using the aggresome detection kit. Data were  
623 collected by flow cytometry;  $n = 3$ . **l** Quantification of data from (k). Data were statistically  
624 analyzed using one-way ANOVA (\*  $p < 0.05$ , \*\*  $p < 0.01$ , \*\*\*  $p < 0.001$ , \*\*\*\*  $p < 0.0001$ ).  
625



626 **Fig. 5** Knockdown of PR130 sensitizes PDAC cells to cytotoxic effects of phendione. **a** MIA  
627 PaCA-2 cells were transfected twice within 48 h with 30 pM of the indicated siRNAs (sicon,  
628 control siRNAs; siPR130, siRNAs against PR130). After two days, cells were incubated with 3  
629  $\mu$ M phendione for 48 h. Cell death analysis was done by flow cytometry using annexin-V/PI  
630 staining. Data are shown as mean values  $\pm$  SD;  $n = 3$ . Data were statistically analyzed using  
631 two-way ANOVA (\*  $p < 0.05$ , \*\*  $p < 0.01$ , \*\*\*  $p < 0.001$ , \*\*\*\*  $p < 0.0001$ ). **b** siRNA transfection  
632 was performed as described in (a). Cells were treated with 3  $\mu$ M phendione for another 24 h  
633 and immunoblot was done to detect PR130 and HSP70. HSP90 served as loading control;  $n$   
634 = 4. **c** Quantification of HSP70 expression and normalization to the loading control of 4  
635 independent immunoblots from (b). **d** siRNA transfections were performed as described in (a);  
636 sicon, control siRNAs; siPR130, siRNAs against PR130. After transfection, MIA PaCA-2 cells  
637 were treated with 3  $\mu$ M phendione (PD) and collected after 24 h and 48 h; con, untreated  
638 control cells. Data were analyzed by using the aggresome detection kit and were measured by  
639 flow cytometry;  $n = 3$ . **e** Quantification of data from (c). Data were statistically analyzed using  
640 one-way ANOVA (\*  $p < 0.05$ , \*\*  $p < 0.01$ , \*\*\*  $p < 0.001$ , \*\*\*\*  $p < 0.0001$ ).  
641

642 **DATA AVAILABILITY STATEMENT**

643 All data are available in the manuscript and at the ProteomeXchange via the PRIDE database,  
644 dataset identifier PXD044854.

645

646 **ACKNOWLEDGEMENTS**

647 We thank Christina Brachetti and Andrea Piée-Staffa for technical support. Prof. Dr. G.  
648 Schneider and Dr. Matthias Wirth were invaluable discussion partners throughout the project.

649

650 **AUTHOR CONTRIBUTIONS**

651 A.N. performed immunoblots and flow cytometry analyses. A.K.L. performed immunoblots and  
652 flow cytometry analyses. A.M.M. established microscopic analysis for all  
653 immunofluorescences. F.B. performed and evaluated the proteomic assay, as well as the  
654 design of the volcano blots. J.M. established PDAC cells cell cultures, carried out and  
655 quantified RNA sequences data. O.H.K. collected funding, designed the experiments,  
656 interpreted the data, supervised the project. A.N. and O.H.K. wrote the manuscript with the  
657 help of all authors.

658

659 **FUNDING**

660 This work was supported by the Wilhelm-Sander Foundation (Grant Nr. 2019.086.1) and the  
661 Brigitte und Dr. Konstanze-Wegener-Stiftung (projects 65 and 110). Additional support to  
662 O.H.K. is from German Research Foundation/Deutsche Forschungsgemeinschaft (DFG,  
663 German Research Foundation) KR2291/14-1, project number 469954457; KR2291/15-1,  
664 project number 495271833; KR2291/16-1, project number 496927074; KR2291/17-1, project  
665 number 502534123; KR2291/18-1, project number 528202295; funded by the Deutsche  
666 Forschungsgemeinschaft (DFG, German Research Foundation) – Project-ID 393547839 –  
667 SFB 1361; and the Walter Schulz Stiftung.

668

669 **INSTITUTIONAL REVIEW BOARD STATEMENT**

670 Not applicable.

671

## 672 INFORMED CONSENT STATEMENT

673 Not applicable.

674

## 675 CONFLICT OF INTERESTS

676 "The authors declare no conflict of interest".

677

## 678 REFERENCES

679

- 680 1 Dyba, T. et al. 1501O Long-term estimates of cancer incidence and mortality for the  
681 EU and EFTA countries according to different demographic scenarios. *Annals of*  
682 *Oncology*. **32**, S1102 (2021).
- 683 2 Rahib, L., Wehner, M. R., Matrisian, L. M. & Nead, K. T. Estimated projection of US  
684 cancer incidence and death to 2040. *JAMA Network Open*. **4**, e214708-e214708  
685 (2021).
- 686 3 Siegel, R. L., Miller, K. D., Wagle, N. S. & Jemal, A. Cancer statistics, 2023. *Ca Cancer*  
687 *J Clin*. **73**, 17-48 (2023).
- 688 4 Smithy, J. W. & O'Reilly, E. M. Pancreas cancer: therapeutic trials in metastatic  
689 disease. *Journal of surgical oncology*. **123**, 1475-1488 (2021).
- 690 5 Dardare, J. et al. Epithelial to mesenchymal transition in patients with pancreatic ductal  
691 adenocarcinoma: State-of-the-art and therapeutic opportunities. *Pharmaceuticals*. **14**,  
692 740 (2021).
- 693 6 Dangi-Garimella, S., Krantz, S. B., Shields, M. A., Grippo, P. J. & Munshi, H. G.  
694 Epithelial-mesenchymal transition and pancreatic cancer progression. (2012).
- 695 7 Mahajan, K. & Mahajan, N. P. Cross talk of tyrosine kinases with the DNA damage  
696 signaling pathways. *Nucleic Acids Res*. **43**, 10588-10601, doi:10.1093/nar/gkv1166  
697 (2015).
- 698 8 Ferguson, F. M. & Gray, N. S. Kinase inhibitors: the road ahead. *Nature reviews Drug*  
699 *discovery*. **17**, 353-377 (2018).
- 700 9 Mullard, A. Phosphatases start shedding their stigma of undruggability. *Nature reviews*  
701 *Drug discovery*. **17**, 847-850 (2018).
- 702 10 Brautigam, D. L., Farrington, C. & Narla, G. Targeting protein phosphatase PP2A for  
703 cancer therapy: development of allosteric pharmaceutical agents. *Clinical Science*.  
704 **135**, 1545-1556 (2021).
- 705 11 Dzulko, M., Pons, M., Henke, A., Schneider, G. & Krämer, O. H. The PP2A subunit  
706 PR130 is a key regulator of cell development and oncogenic transformation. *Biochimica*  
707 *et Biophysica Acta (BBA)-Reviews on Cancer*. **1874**, 188453 (2020).
- 708 12 Haanen, T. J., O'Connor, C. M. & Narla, G. Biased holoenzyme assembly of Protein  
709 Phosphatase 2A (PP2A): from cancer to small molecules. *Journal of Biological*  
710 *Chemistry*. **298** (2022).
- 711 13 Ronk, H., Rosenblum, J. S., Kung, T. & Zhuang, Z. Targeting PP2A for cancer  
712 therapeutic modulation. *Cancer Biology & Medicine*. **19**, 1428-1439 (2022).
- 713 14 Pohl, C. & Dikic, I. Cellular quality control by the ubiquitin-proteasome system and  
714 autophagy. *Science*. **366**, 818-822 (2019).

- 715 15 Park, J., Cho, J. & Song, E. J. Ubiquitin–proteasome system (UPS) as a target for  
716 anticancer treatment. *Archives of Pharmacal Research*. **43**, 1144-1161 (2020).
- 717 16 Vargas, J. N. S., Hamasaki, M., Kawabata, T., Youle, R. J. & Yoshimori, T. The  
718 mechanisms and roles of selective autophagy in mammals. *Nature reviews Molecular*  
719 *cell biology*. **24**, 167-185 (2023).
- 720 17 Yun, C. W., Kim, H. J., Lim, J. H. & Lee, S. H. Heat shock proteins: agents of cancer  
721 development and therapeutic targets in anti-cancer therapy. *Cells*. **9**, 60 (2019).
- 722 18 Rosenzweig, R., Nillegoda, N. B., Mayer, M. P. & Bukau, B. The Hsp70 chaperone  
723 network. *Nature reviews molecular cell biology*. **20**, 665-680 (2019).
- 724 19 Velasco, L., Dublang, L., Moro, F. & Muga, A. The complex phosphorylation patterns  
725 that regulate the activity of Hsp70 and its cochaperones. *International journal of*  
726 *molecular sciences*. **20**, 4122 (2019).
- 727 20 Reinhout, S. & Janssens, V. Physiologic functions of PP2A: Lessons from genetically  
728 modified mice. *Biochimica Et Biophysica Acta (BBA)-Molecular Cell Research*. **1866**,  
729 31-50 (2019).
- 730 21 Duong, F. H. et al. Protein phosphatase 2A promotes hepatocellular carcinogenesis in  
731 the diethylnitrosamine mouse model through inhibition of p53. *Carcinogenesis*. **35**, 114-  
732 122 (2014).
- 733 22 Gong, S.-J. et al. Upregulation of PP2Ac predicts poor prognosis and contributes to  
734 aggressiveness in hepatocellular carcinoma. *Cancer Biology & Therapy*. **17**, 151-162  
735 (2016).
- 736 23 Yu, S. et al. PPP2R2D, a regulatory subunit of protein phosphatase 2A, promotes  
737 gastric cancer growth and metastasis via mechanistic target of rapamycin activation.  
738 *International Journal of Oncology*. **52**, 2011-2020 (2018).
- 739 24 Sablina, A. A., Hector, M., Colpaert, N. & Hahn, W. C. Identification of PP2A complexes  
740 and pathways involved in cell transformation. *Cancer research*. **70**, 10474-10484  
741 (2010).
- 742 25 He, J.-J. et al. High expression of protein phosphatase 2 regulatory subunit B<sup>α</sup> predicts  
743 poor outcome in hepatocellular carcinoma patients after liver transplantation.  
744 *World Journal of Gastrointestinal Oncology*. **13**, 716 (2021).
- 745 26 Chen, H. et al. Protein phosphatase 2 regulatory subunit B<sup>α</sup> silencing inhibits  
746 tumor cell proliferation in liver cancer. *Cancer Medicine*. **8**, 7741-7753 (2019).
- 747 27 Deng, X. et al. Clustering analysis and prognostic model based on PI3K/AKT-related  
748 genes in pancreatic cancer. *Frontiers in Oncology*. **13**, 1112104 (2023).
- 749 28 Yang, J. Y. et al. SF3B1 mutation in pancreatic cancer contributes to aerobic glycolysis  
750 and tumor growth through a PP2A–c-Myc axis. *Molecular Oncology*. **15**, 3076-3090  
751 (2021).
- 752 29 Chung, V. et al. Safety, Tolerability, and Preliminary Activity of LB-100, an Inhibitor of  
753 Protein Phosphatase 2A, in Patients with Relapsed Solid Tumors: An Open-Label,  
754 Dose Escalation, First-in-Human, Phase I TrialPhase I Trial of LB-100, an Inhibitor of  
755 PP2A. *Clinical Cancer Research*. **23**, 3277-3284 (2017).
- 756 30 Yue, J. et al. Targeted chemotherapy overcomes drug resistance in melanoma. *Genes*  
757 *& development*. **34**, 637-649 (2020).
- 758 31 Nguyen, A. et al. Class 1 histone deacetylases and ataxia-telangiectasia mutated  
759 kinase control the survival of murine pancreatic cancer cells upon dNTP depletion.  
760 *Cells*. **10**, 2520 (2021).
- 761 32 Mueller, S. et al. Evolutionary routes and KRAS dosage define pancreatic cancer  
762 phenotypes. *Nature*. **554**, 62-68 (2018).
- 763 33 Gradiz, R., Silva, H. C., Carvalho, L., Botelho, M. F. & Mota-Pinto, A. MIA PaCa-2 and  
764 PANC-1–pancreas ductal adenocarcinoma cell lines with neuroendocrine  
765 differentiation and somatostatin receptors. *Scientific reports*. **6**, 21648 (2016).
- 766 34 Hill, S. E. et al. Benzothiazole Substitution Analogs of Rhodacyanine Hsp70 Inhibitors  
767 Modulate Tau Accumulation. *ACS Chemical Biology*. **18**, 1124-1135 (2023).

- 768 35 Pilecka, I., Sadowski, L., Kalaidzidis, Y. & Miaczynska, M. Recruitment of APPL1 to  
769 ubiquitin-rich aggresomes in response to proteasomal impairment. *Experimental cell*  
770 *research*. **317**, 1093-1107 (2011).
- 771 36 Bornheim, R. et al. A dominant vimentin mutant upregulates Hsp70 and the activity of  
772 the ubiquitin-proteasome system, and causes posterior cataracts in transgenic mice.  
773 *Journal of cell science*. **121**, 3737-3746 (2008).
- 774 37 Hu, H.-F. et al. Mutations in key driver genes of pancreatic cancer: Molecularly targeted  
775 therapies and other clinical implications. *Acta Pharmacologica Sinica*. **42**, 1725-1741  
776 (2021).
- 777 38 Ji, C. H. et al. The AUTOTAC chemical biology platform for targeted protein  
778 degradation via the autophagy-lysosome system. *Nature communications*. **13**, 904  
779 (2022).
- 780 39 Byun, Y. et al. Caspase cleavage of vimentin disrupts intermediate filaments and  
781 promotes apoptosis. *Cell Death & Differentiation*. **8**, 443-450 (2001).
- 782 40 Genovese, G. et al. Synthetic vulnerabilities of mesenchymal subpopulations in  
783 pancreatic cancer. *Nature*. **542**, 362-366 (2017).
- 784 41 Backe, S. J., Sager, R. A., Woodford, M. R., Makedon, A. M. & Mollapour, M. Post-  
785 translational modifications of Hsp90 and translating the chaperone code. *Journal of*  
786 *Biological Chemistry*. **295**, 11099-11117 (2020).
- 787 42 Masser, A. E., Ciccarelli, M. & Andréasson, C. Hsf1 on a leash—controlling the heat  
788 shock response by chaperone titration. *Experimental Cell Research*. **396**, 112246  
789 (2020).
- 790 43 Dias, M. H. et al. PP2A inhibition instructs spliceosome phosphorylation to create  
791 splicing vulnerability in colon adenocarcinoma. *bioRxiv*. 2023.2007. 2012.548685  
792 (2023).
- 793 44 Silver, J. T. & Noble, E. G. Regulation of survival gene hsp70. *Cell Stress and*  
794 *Chaperones*. **17**, 1-9 (2012).
- 795 45 Young, Z. T. et al. Stabilizing the Hsp70-Tau complex promotes turnover in models of  
796 tauopathy. *Cell chemical biology*. **23**, 992-1001 (2016).
- 797 46 Srinivasan, S. R. et al. Heat Shock Protein 70 (Hsp70) Suppresses RIP1-Dependent  
798 Apoptotic and Necroptotic Cascades Hsp70 Inhibition Activates Cell Death. *Molecular*  
799 *cancer research*. **16**, 58-68 (2018).
- 800 47 Kuzuoglu-Ozturk, D. et al. N-myc–Mediated Translation Control Is a Therapeutic  
801 Vulnerability in Medulloblastoma. *Cancer Research*. **83**, 130-140 (2023).
- 802 48 Guo, S. et al. Epidermal growth factor receptor-dependent maintenance of cardiac  
803 contractility. *Cardiovascular Research*. **118**, 1276-1288 (2022).
- 804 49 Shi, X. et al. GREM1/PPP2R3A expression in heterogeneous fibroblasts initiates  
805 pulmonary fibrosis. *Cell & Bioscience*. **12**, 123 (2022).
- 806 50 Biederstädt, A. et al. SUMO pathway inhibition targets an aggressive pancreatic cancer  
807 subtype. *Gut*. **69**, 1472-1482 (2020).
- 808 51 Dejung, M. et al. Quantitative proteomics uncovers novel factors involved in  
809 developmental differentiation of *Trypanosoma brucei*. *PLoS pathogens*. **12**, e1005439  
810 (2016).
- 811 52 Kiweler, N. et al. The histone deacetylases HDAC1 and HDAC2 are required for the  
812 growth and survival of renal carcinoma cells. *Archives of toxicology*. **92**, 2227-2243  
813 (2018).
- 814 53 Perez-Riverol, Y. et al. The PRIDE database resources in 2022: a hub for mass  
815 spectrometry-based proteomics evidences. *Nucleic Acids Res*. **50**, D543-D552,  
816 doi:10.1093/nar/gkab1038 (2022).
- 817

a

bioRxiv preprint doi: <https://doi.org/10.1101/2023.09.03.556106>; this version posted September 5, 2023. The copyright holder for this preprint (which was not certified by peer review) is the author/funder. All rights reserved. No reuse allowed without permission.

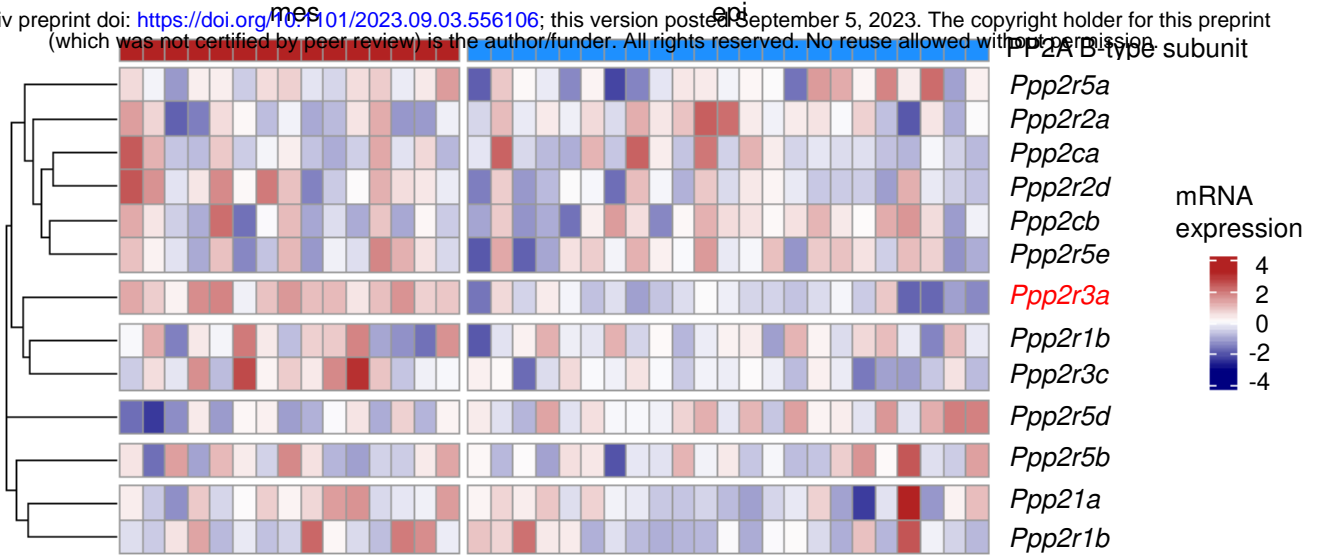

b

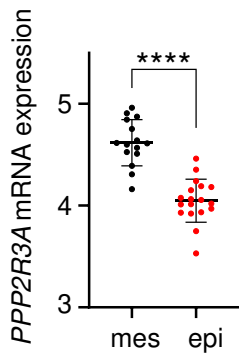

c

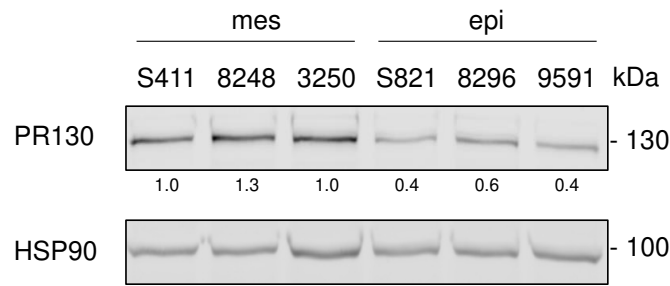

d

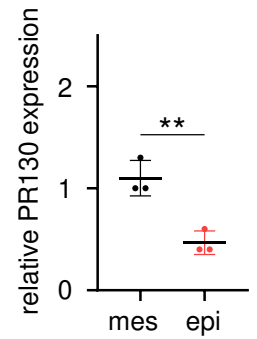

e

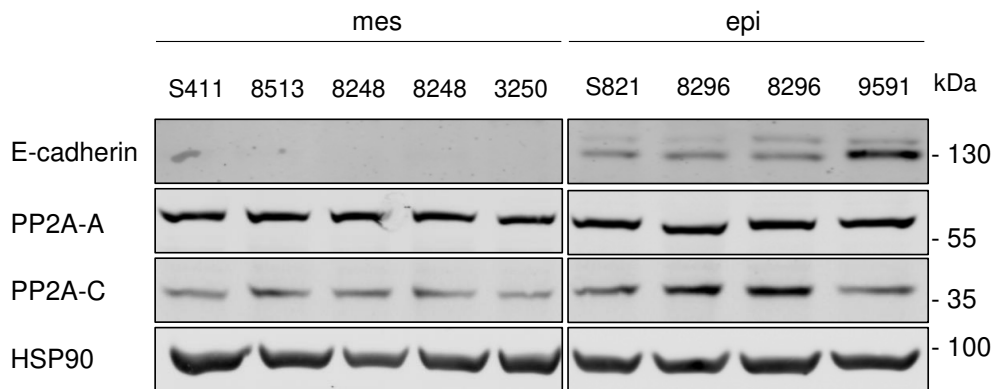

a

bioRxiv preprint doi: <https://doi.org/10.1101/2023.09.03.556106>; this version posted September 5, 2023. The copyright holder for this preprint (which was not certified by peer review) is the author/funder. All rights reserved. No reuse allowed without permission.

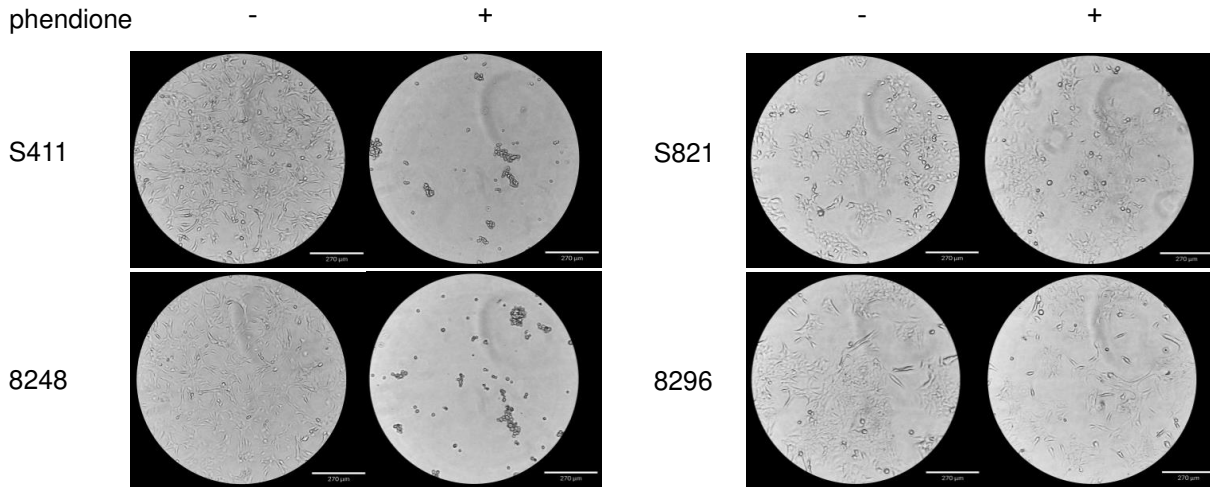

b

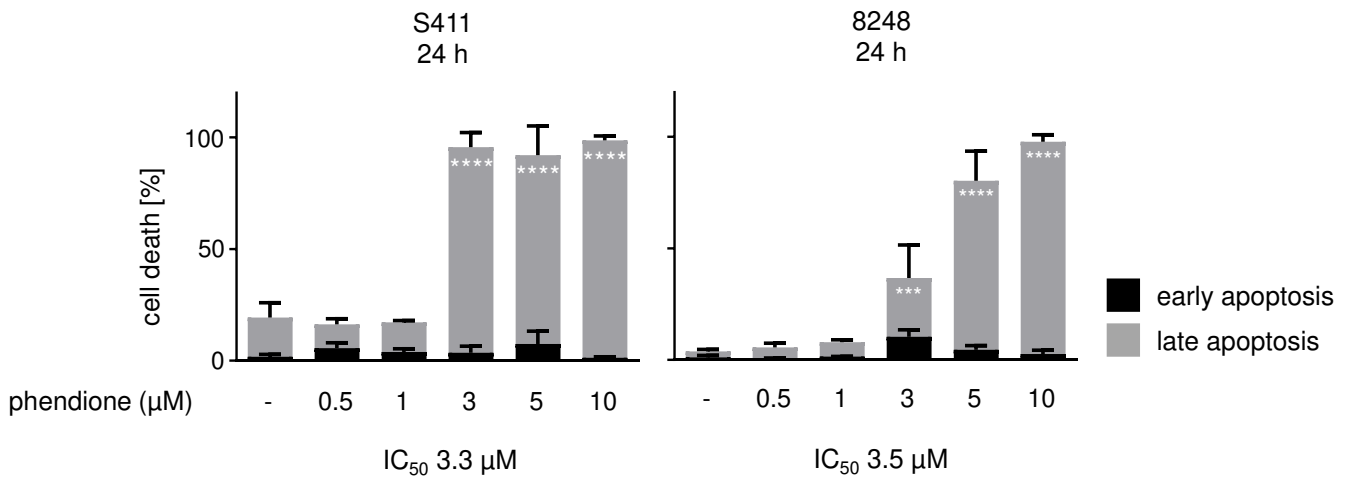

c

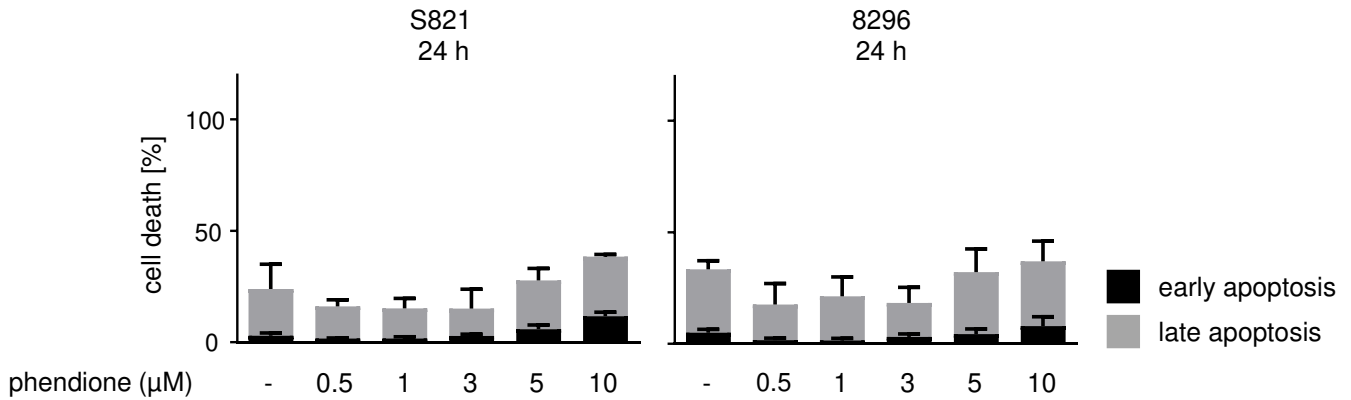

bioRxiv preprint doi: <https://doi.org/10.1101/2023.09.03.556106>; this version posted September 5, 2023. The copyright holder for this preprint (which was not certified by peer review) is the author/funder. All rights reserved. No reuse allowed without permission.

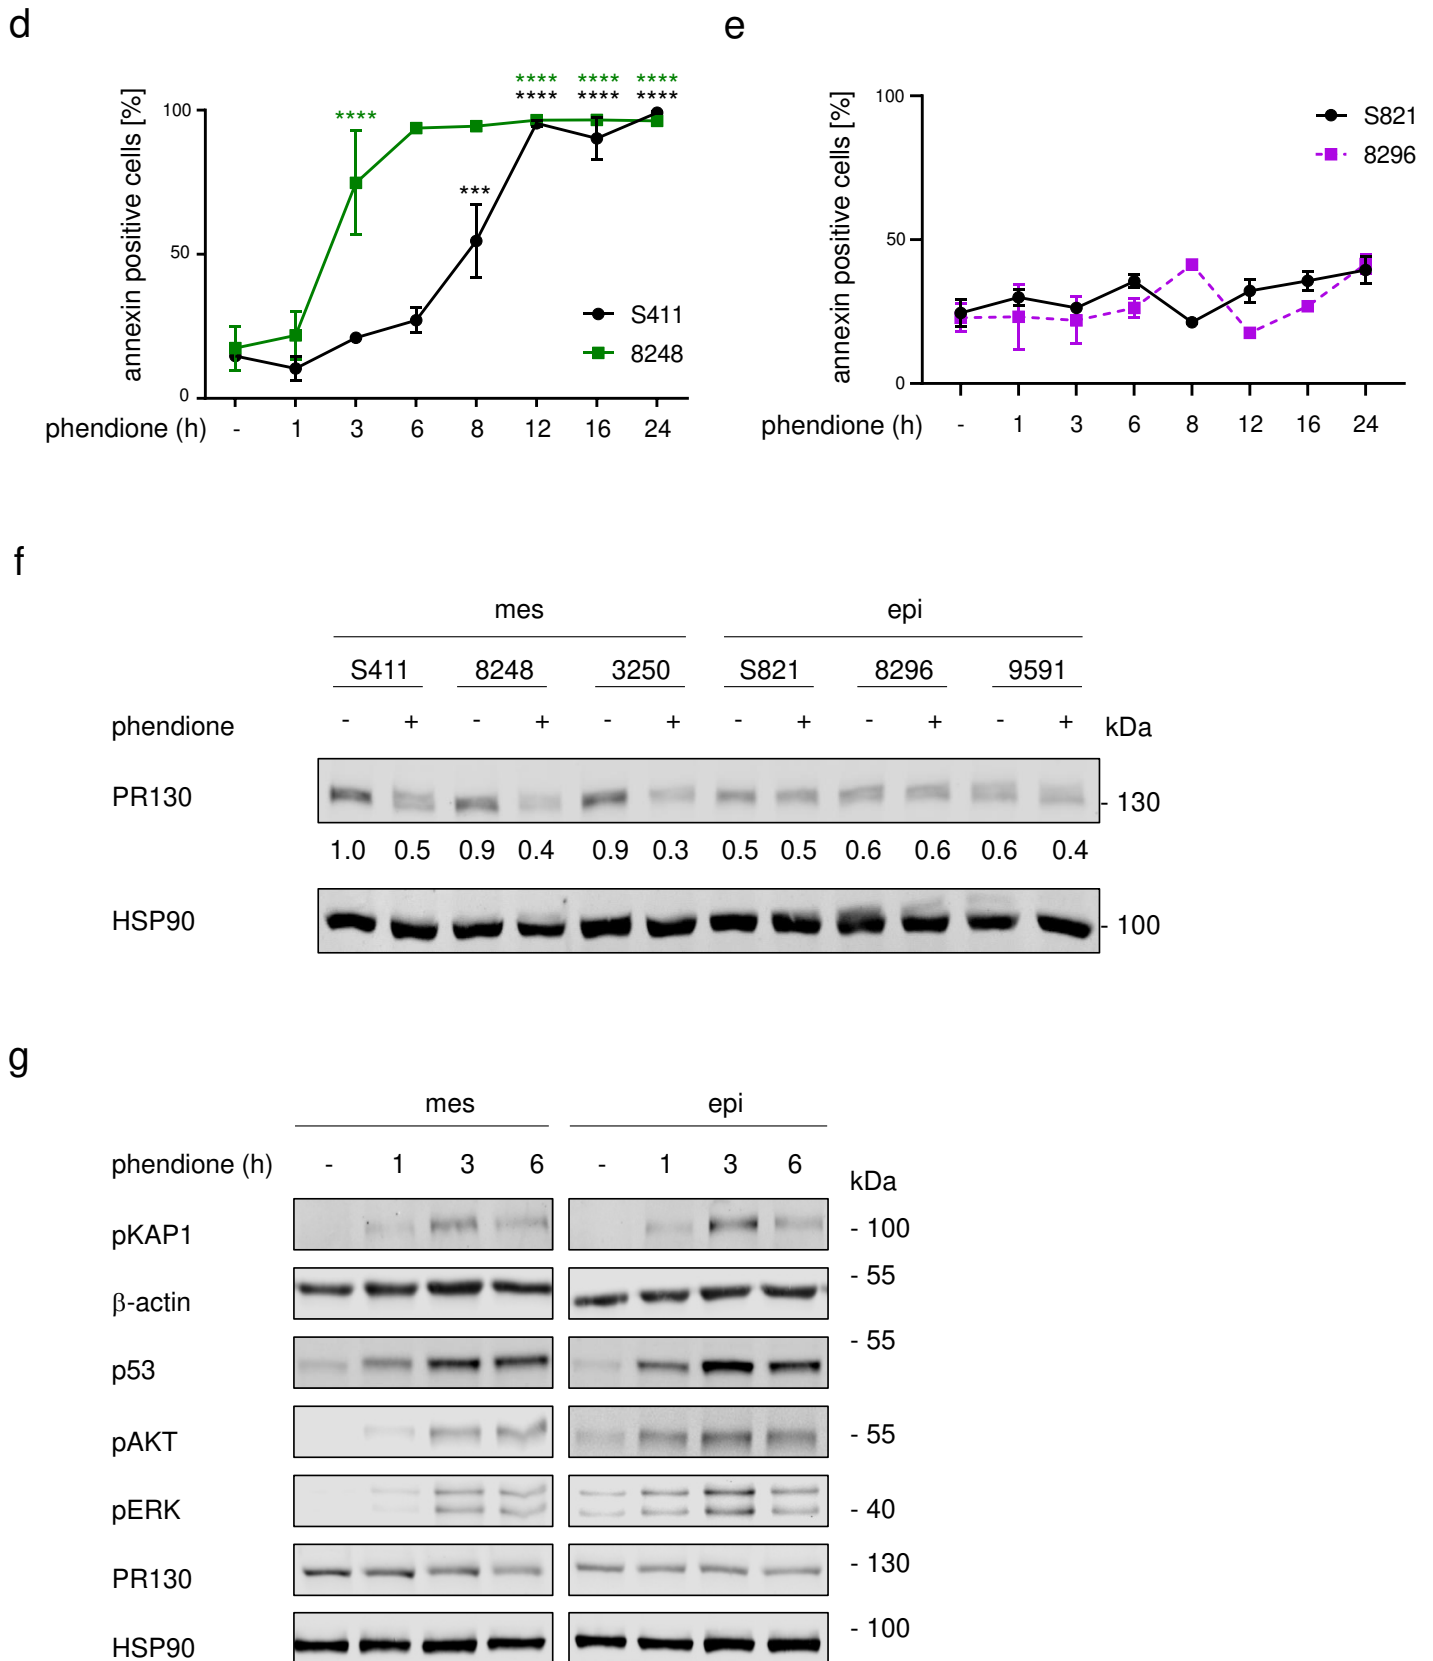



a

bioRxiv preprint doi: <https://doi.org/10.1101/2023.09.03.556106>; this version posted September 5, 2023. The copyright holder for this preprint (which was not certified by peer review) is the author/funder. All rights reserved. No reuse allowed without permission.

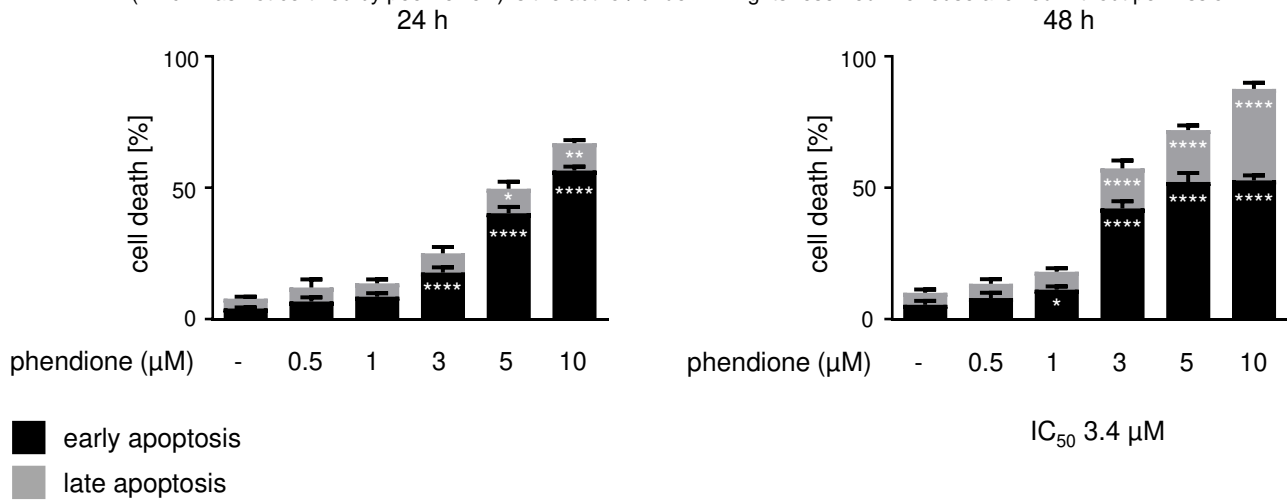

b

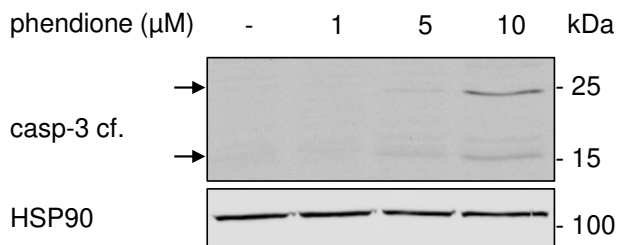

c

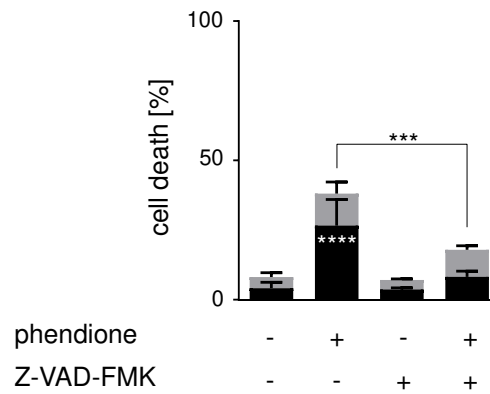

d

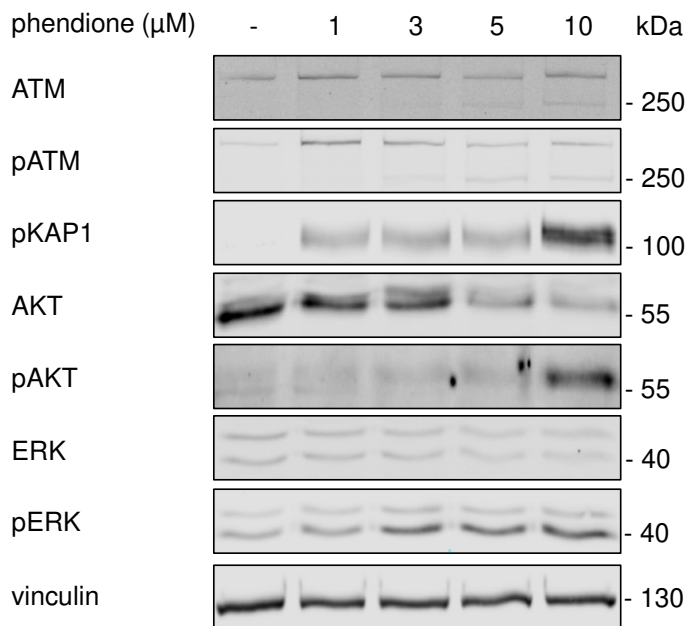

e

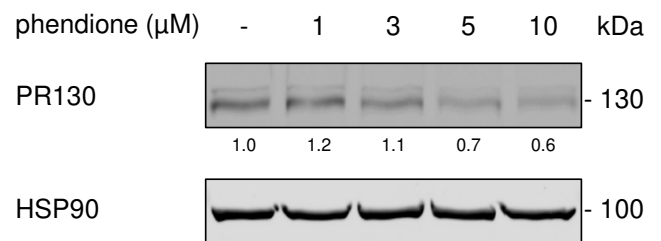

f

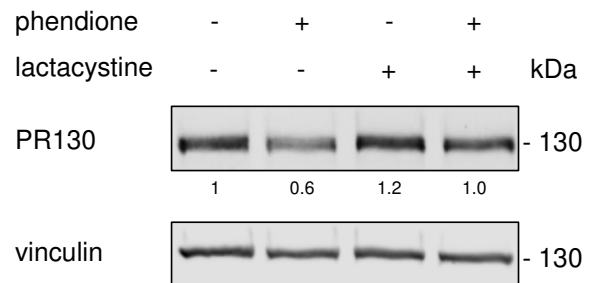

a

bioRxiv preprint doi: <https://doi.org/10.1101/2023.09.03.556106>; this version posted September 5, 2023. The copyright holder for this preprint (which was not certified by peer review) is the author/funder. All rights reserved. No reuse allowed without permission.

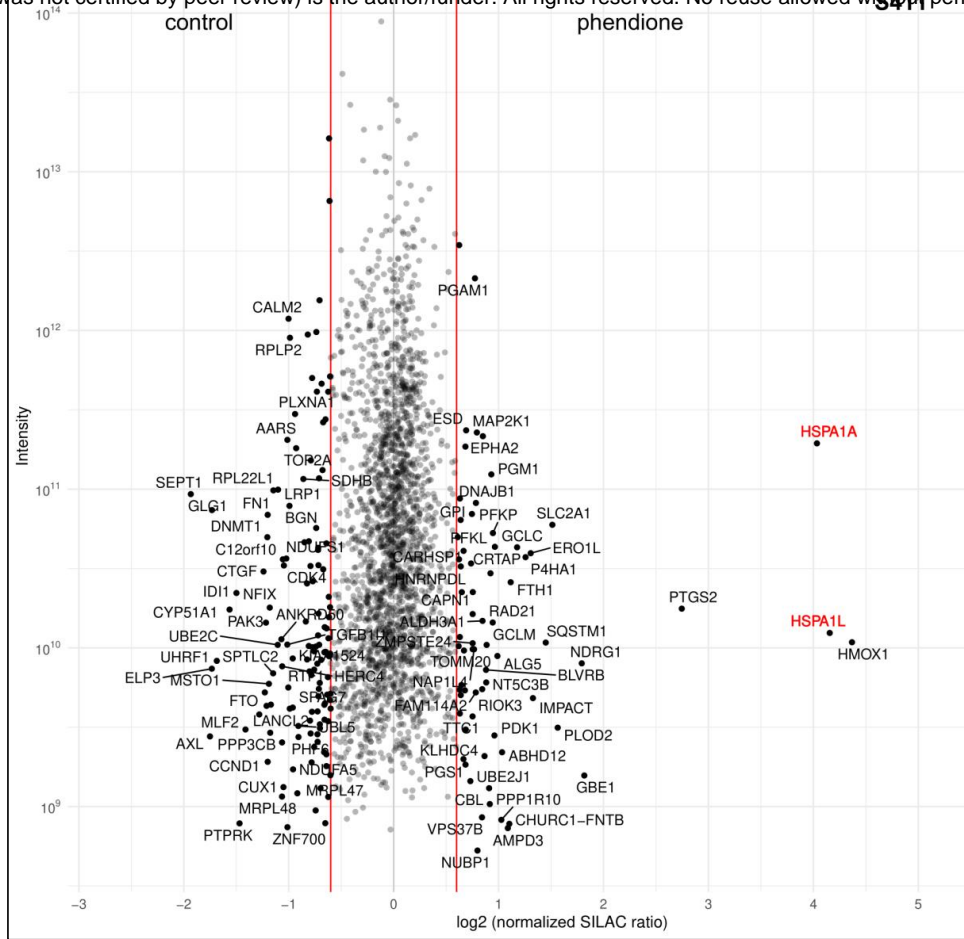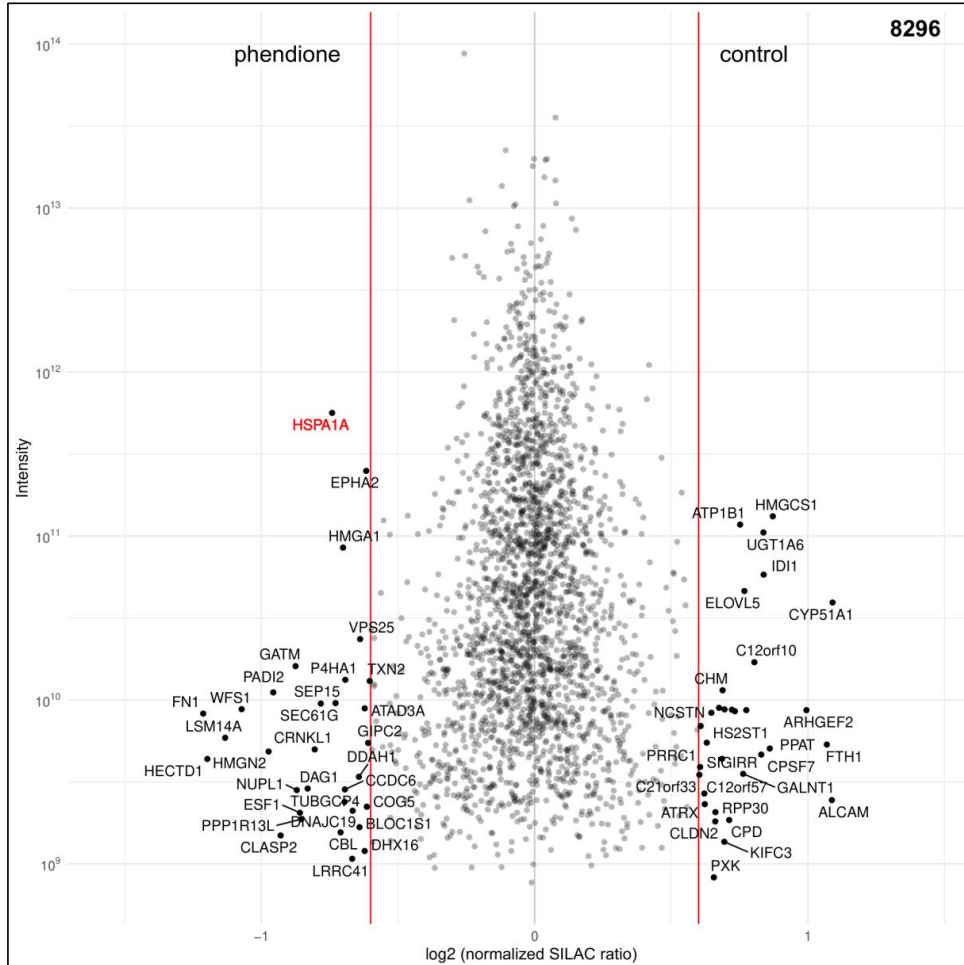

**b** bioRxiv preprint doi: <https://doi.org/10.1101/2023.09.03.556106>; this version posted September 5, 2023. The copyright holder for this preprint (which was not certified by peer review) is the author/funder. All rights reserved. No reuse allowed without permission.

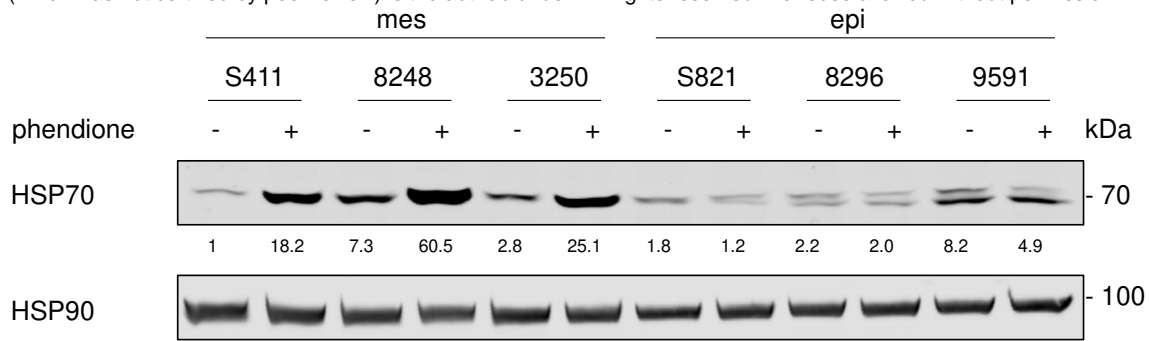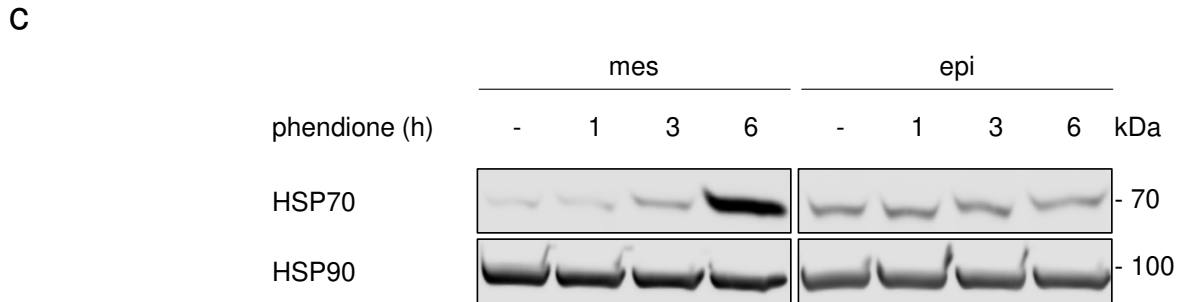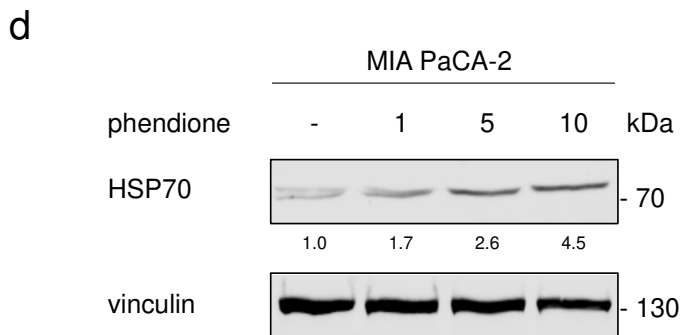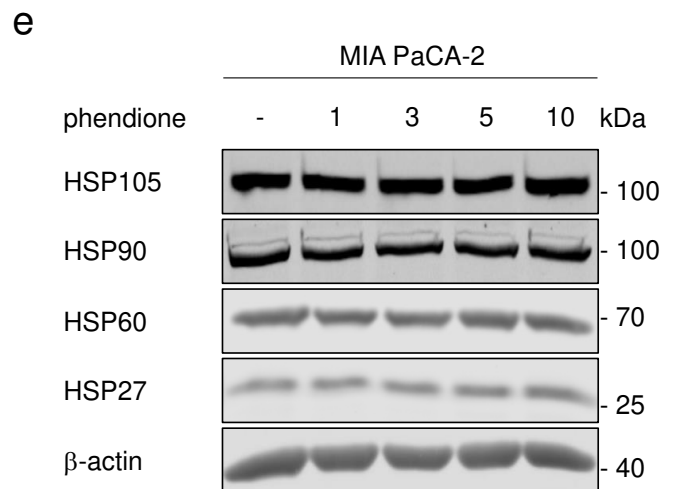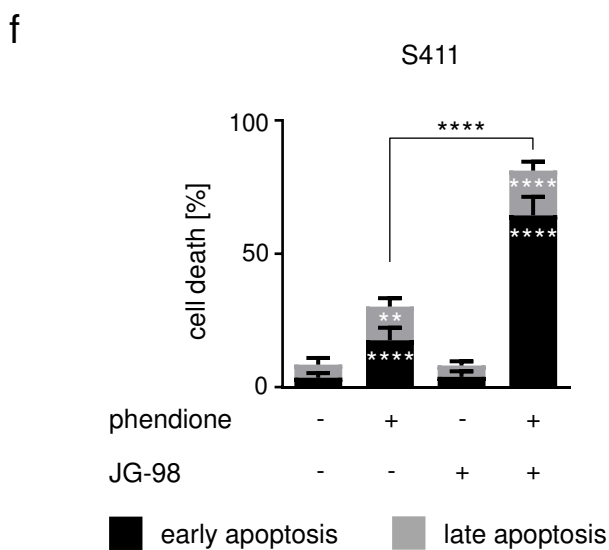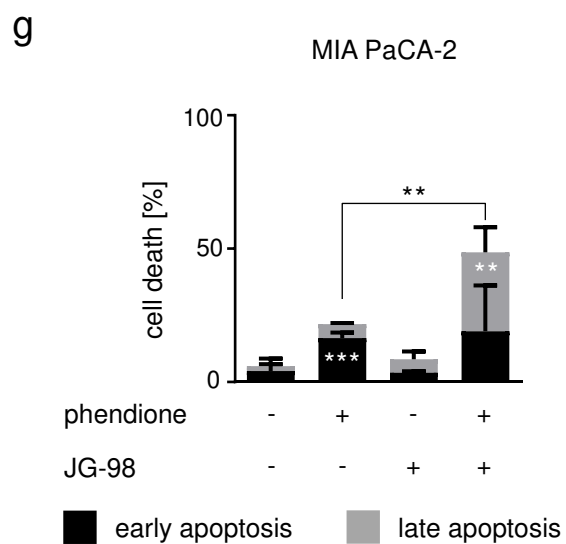

bioRxiv preprint doi: <https://doi.org/10.1101/2023.09.03.556106>; this version posted September 5, 2023. The copyright holder for this preprint (which was not certified by peer review) is the author/funder. All rights reserved. No reuse allowed without permission.

h

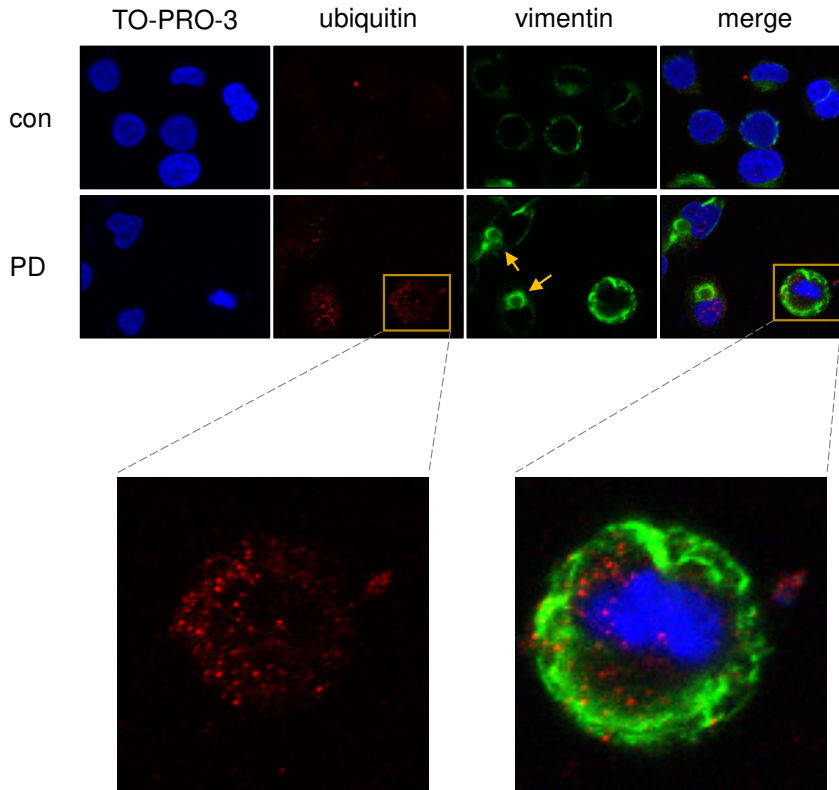

i

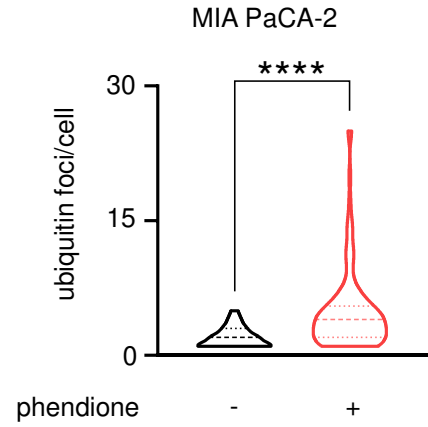

j

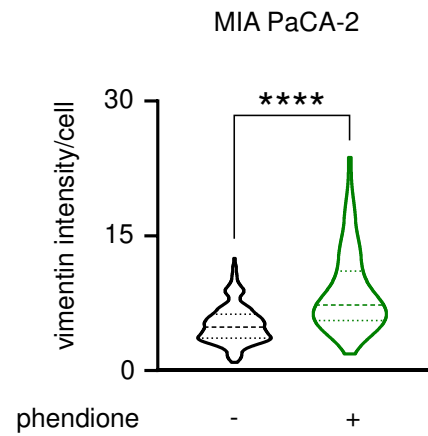

k

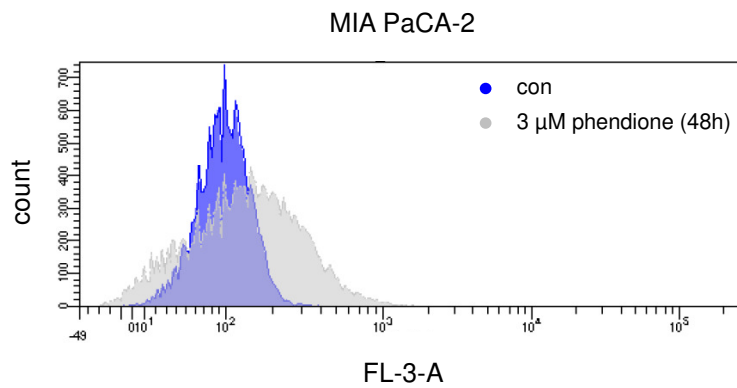

l

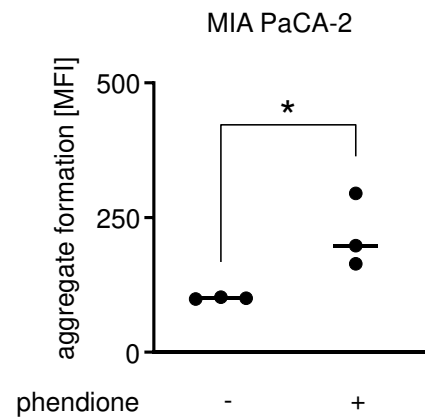

a

bioRxiv preprint doi: <https://doi.org/10.1101/2023.09.03.556106>; this version posted September 5, 2023. The copyright holder for this preprint (which was not certified by peer review) is the author/funder. All rights reserved. No reuse allowed without permission.

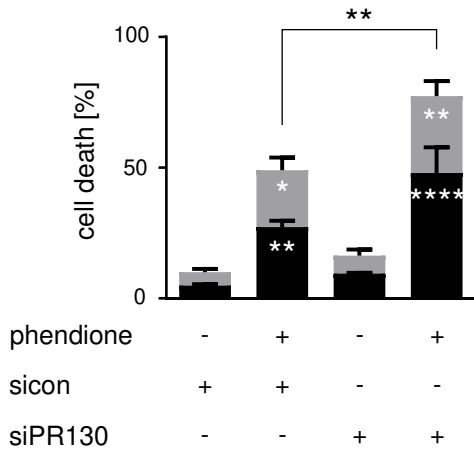

b

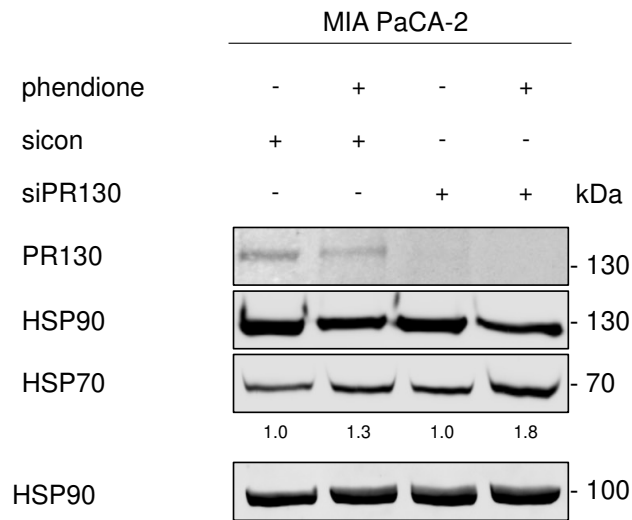

c

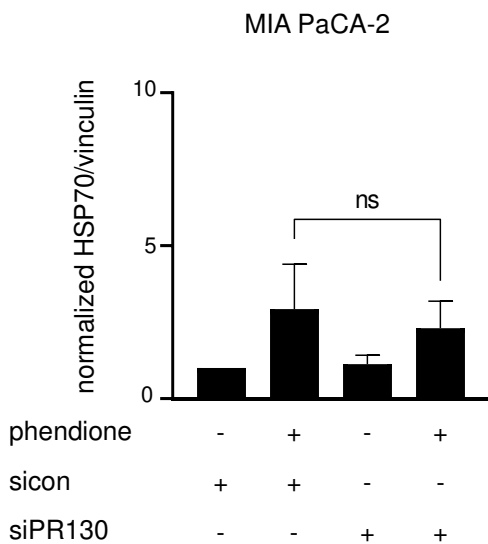

d

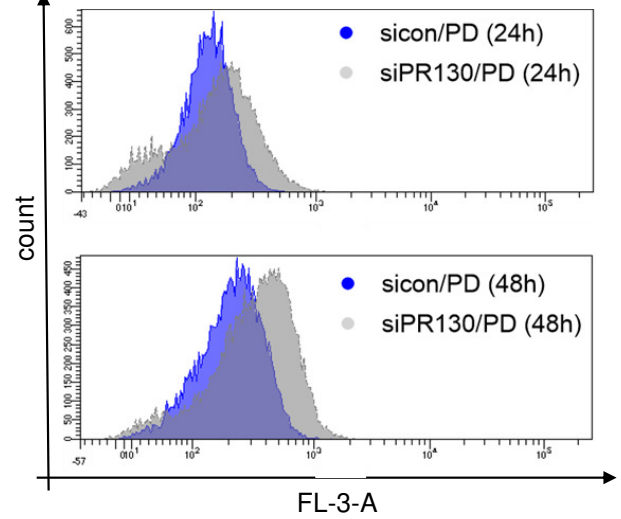

e

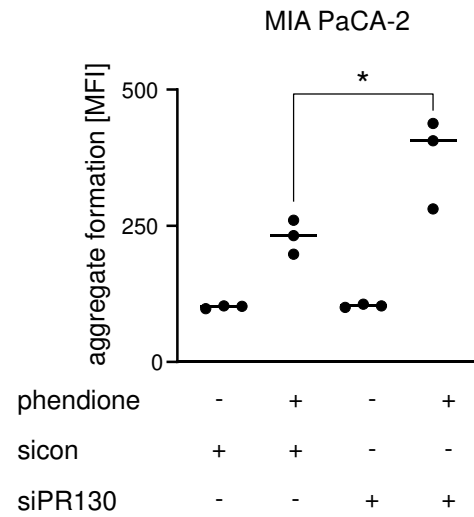

Source: https://www.biorxiv.org/content/10.1101/2023.09.03.556106v1.full.pdf
